1 **Broadly neutralizing antibodies targeting a conserved silent face of spike RBD**  
2 **resist extreme SARS-CoV-2 antigenic drift**

3

4 **Authors**

5 Ge Song<sup>1,2,3†</sup>, Meng Yuan<sup>4†</sup>, Hejun Liu<sup>4†</sup>, Tazio Capozzola<sup>1,2,3†</sup>, Ryan N. Lin<sup>4</sup>, Jonathan L.  
6 Torres<sup>4</sup>, Wan-ting He<sup>1,2,3</sup>, Rami Musharrafieh<sup>1,2,3</sup>, Katharina Dueker<sup>1,2,3</sup>, Panpan Zhou<sup>1,2,3</sup>,  
7 Sean Callaghan<sup>1,2,3</sup>, Nitesh Mishra<sup>1,2,3</sup>, Peter Yong<sup>1,2,3</sup>, Fabio Anzanello<sup>1,2,3</sup>, Gabriel  
8 Avillion<sup>1,2,3</sup>, Anh Lina Vo<sup>1,2,3</sup>, Xuduo Li<sup>1,2,3</sup>, Muzamil Makhdoomi<sup>1</sup>, Ziqi Feng<sup>4</sup>, Xueyong  
9 Zhu<sup>4</sup>, Linghang Peng<sup>1</sup>, David Nemazee<sup>1</sup>, Yana Safonova<sup>5</sup>, Bryan Briney<sup>1,2,3</sup>, Andrew B  
10 Ward<sup>1,2,3,4</sup>, Dennis R. Burton<sup>1,2,3,6\*</sup>, Ian A. Wilson<sup>2,3,4,7\*</sup>, Raiees Andrabi<sup>1,2,3,8\*</sup>

11

12 **Affiliations**

13 <sup>1</sup>Department of Immunology and Microbiology, The Scripps Research Institute, La Jolla,  
14 CA 92037, USA.

15 <sup>2</sup>IAVI Neutralizing Antibody Center, The Scripps Research Institute, La Jolla, CA 92037,  
16 USA

17 <sup>3</sup>Consortium for HIV/AIDS Vaccine Development (CHAVD), The Scripps Research  
18 Institute, La Jolla, CA 92037, USA.

19 <sup>4</sup>Department of Integrative Structural and Computational Biology, The Scripps Research  
20 Institute, La Jolla, CA 92037, USA.

21 <sup>5</sup>Department of Computer Science, Johns Hopkins University, Baltimore, MD 21218, USA

22 <sup>6</sup>Ragon Institute of Massachusetts General Hospital, Massachusetts Institute of  
23 Technology, and Harvard University, Cambridge, MA 02139, USA.

24 <sup>7</sup>Skaggs Institute for Chemical Biology, The Scripps Research Institute, La Jolla, CA  
25 92037, USA

26 †These authors contributed equally to this work.

27 <sup>8</sup>Lead Contact

28 \*Corresponding author. Email: [burton@scripps.edu](mailto:burton@scripps.edu) (D.R.B.); [wilson@scripps.edu](mailto:wilson@scripps.edu)  
29 (I.A.W.); [andrabi@scripps.edu](mailto:andrabi@scripps.edu) (R.A.).

30

31 **Summary**

32  
33 Developing broad coronavirus vaccines requires identifying and understanding the  
34 molecular basis of broadly neutralizing antibody (bnAb) spike sites. In our previous work,  
35 we identified sarbecovirus spike RBD group 1 and 2 bnAbs. We have now shown that  
36 many of these bnAbs can still neutralize highly mutated SARS-CoV-2 variants, including  
37 the XBB.1.5. Structural studies revealed that group 1 bnAbs use recurrent germline-  
38 encoded CDRH3 features to interact with a conserved RBD region that overlaps with  
39 class 4 bnAb site. Group 2 bnAbs recognize a less well-characterized "site V" on the RBD  
40 and destabilize spike trimer. The site V has remained largely unchanged in SARS-CoV-  
41 2 variants and is highly conserved across diverse sarbecoviruses, making it a promising  
42 target for broad coronavirus vaccine development. Our findings suggest that targeted  
43 vaccine strategies may be needed to induce effective B cell responses to escape resistant  
44 subdominant spike RBD bnAb sites.

45

## 46 **Introduction**

47  
48 Broadly neutralizing antibody (bnAb) epitope-based vaccines are an important strategy  
49 for developing effective interventions against coronaviruses. Among the most potent and  
50 dominant neutralizing antibodies (nAbs) elicited in SARS-CoV-2 human infection or  
51 vaccination are those targeting the SARS-CoV-2 spike receptor binding domain (RBD) <sup>1-</sup>  
52 <sup>10</sup>. Vaccines that induce these spike RBD nAbs have shown high effectiveness in reducing  
53 COVID-19 disease severity and hospitalization <sup>11-14</sup>. However, the emergence of SARS-  
54 CoV-2 variants of concern (VOCs) has led to the majority of these RBD-targeting  
55 antibodies losing their neutralizing activity <sup>15-24</sup>. The bulk of the mutations on the spikes  
56 of SARS-CoV-2 VOCs occur in the RBD region, resulting in substantially reduced potency  
57 or loss of neutralizing activity of most clinically approved RBD-targeting nAbs <sup>15,21,25</sup>. This  
58 scenario highlights the urgent need to identify bnAbs that can target RBD epitopes that  
59 are more highly conserved and resistant to mutation. Such bnAbs are crucial for  
60 developing antibody-based interventions and variant-proof vaccines and may also be  
61 important against emerging coronaviruses with the potential to seed future pandemics in  
62 humans.

63  
64 RBD nAbs have been classified into 4 major classes, class 1-4, and several subclasses  
65 <sup>3,10,26</sup>. Class 1 and 2 RBD antibodies are the most potent and frequently elicited nAbs that  
66 target overlapping regions of the receptor binding site (RBS), where the host cell receptor  
67 ACE2 binds <sup>3,6,10,26,27</sup>. These nAbs exhibit limited cross-reactivity with related  
68 coronaviruses and are easily escaped by SARS-CoV-2 variants <sup>26,27</sup>. Class 3 and 4 RBD

69 nAbs are less potent and are less frequently elicited in humans but target relatively more  
70 conserved regions of the RBD and exhibit cross-reactivity with VOCs and diverse  
71 sarbecoviruses <sup>3,26,28-38</sup>. Elicitation of nAb responses that target class 3 and 4 RBD sites  
72 or the nearby overlapping nAb epitopes are thus more desirable for broad sarbecovirus  
73 vaccine strategies.

74

75 In a previous study, we described two sets of RBD bnAbs, group 1 and group 2, that  
76 neutralize diverse ACE2-utilizing sarbecoviruses and exhibit binding to clade 2 and 3 non-  
77 ACE2 sarbecovirus spike RBDs by targeting more conserved RBD epitopes <sup>34</sup>. Group 1  
78 RBD bnAbs are more potent in neutralization, while group 2 RBD bnAbs show relatively  
79 broader binding with different sarbecovirus clades, especially clade 2. Both group 1 and  
80 group 2 RBD bnAbs appear to be less frequently elicited in SARS-CoV-2 infection or  
81 vaccination and were isolated from two individuals with hybrid immunity (COVID-19  
82 recovered and then vaccinated humans) <sup>34</sup>.

83

84 In the current study, we investigated the molecular basis of sarbecovirus neutralization  
85 breadth by these group 1 and 2 RBD bnAbs and implications for broad vaccine strategies.  
86 We first tested the neutralization capacity of a select subset of the most potent and  
87 broadest group 1 and group 2 RBD bnAbs with recently emerged SARS-CoV-2 variants.  
88 We observed that some of these RBD bnAbs still retain neutralizing activities against  
89 highly evolved SARS-CoV-2 variants, including BA.4/5 and XBB.1.5. Group 2 RBD bnAbs  
90 were less affected by the more recent Omicron escape mutations. Furthermore, we  
91 determined crystal structures of multiple group 1 and group 2 RBD bnAbs to provide a

92 molecular basis for the broad neutralization of sarbecoviruses and resistance to Omicron  
93 neutralization escape. The group 1 RBD bnAbs target a relatively conserved epitope  
94 proximal to the class 4 nAb target site or CR3022 cryptic site. The group 2 RBD bnAbs  
95 recognize a conserved and relatively 'silent' face of the spike RBD, previously termed site  
96 V or lateral site <sup>10</sup>. The group 2 RBD bnAb site V is cryptic on the native-like spike, and  
97 bnAbs targeting this site disrupt the spike as a possible mechanism of neutralization. Our  
98 data further suggest that both group 1 and 2 RBD bnAb memory B cells may be boostable  
99 with bivalent or heterologous SARS spike vaccines towards greater neutralization  
100 breadth. Overall, we provide a detailed molecular characterization of RBD bnAb epitopes  
101 that could serve as templates for the development of broad coronavirus vaccines,  
102 provided that appropriate immunogens can be engineered.

103

## 104 **Results**

105

### 106 **Sarbecovirus spike RBD bnAbs that resist SARS-CoV-2 antigenic escape**

107

108 As SARS-CoV-2 antibody escape variants continue to emerge, it has become  
109 increasingly important to identify bnAbs targeting conserved epitopes that can tolerate  
110 the large number of antigenic escape mutations found especially on the Omicron variants.  
111 We previously isolated a broad panel of sarbecovirus bnAbs from COVID-19-recovered  
112 donors who were subsequently vaccinated<sup>34</sup>. These bnAbs target two distinct regions on  
113 the RBD, categorized as group 1 and group 2, based on competition binning studies using  
114 SARS-CoV-2 nAbs of known specificities. Group 1 bnAbs compete with RBD class 4 site  
115 nAbs and group 2 target a less well-characterized conserved RBD region. Here, to  
116 investigate the ability of these bnAbs to resist SARS-CoV-2 escape mutations, we tested  
117 the neutralization ability of the group 1 (n = 14) and group 2 (n = 5) RBD bnAbs against  
118 a broad panel of SARS-CoV-2 variants including Omicron lineage variants (Figure 1 and  
119 Table S1). Group 1 RBD bnAbs were found to be relatively more potent and neutralized  
120 the early SARS-CoV-2 variants (Alpha, Beta, Gamma, and Delta) equally efficiently;  
121 however, their neutralizing activities dropped substantially against the Omicron variants  
122 (Geometric mean IC<sub>50</sub> change: range = 14 – 105-fold IC<sub>50</sub> drop) (Figure 1B and Table  
123 S1). The most pronounced neutralization loss was observed against BA.2 (geometric  
124 mean IC<sub>50</sub> drop = 105-fold) and BA.2.75 (geometric mean IC<sub>50</sub> drop = 104-fold) Omicron  
125 variants, respectively. Notably, four of the group 1 RBD bnAbs (CC25.3, CC25.36,

126 CC25.54 and CC84.24) retained neutralizing activity (albeit less potently with Omicron  
127 variants) with most or all of the SARS-CoV-2 variants tested (Table S1).

128  
129 Group 2 RBD bnAbs were shown to have an intrinsically lower neutralization IC<sub>50</sub> potency,  
130 but were comparatively less sensitive to Omicron variant mutations (Geometric mean IC<sub>50</sub>  
131 change: range = 2 – 17-fold IC<sub>50</sub> drop) (Figure 1C and Table S1). Similar to group 1 RBD  
132 bnAbs, neutralization by the group 2 RBD bnAbs was minimally affected against the non-  
133 Omicron SARS-CoV-2 variants. One out of five group 2 RBD bnAbs substantially lost  
134 neutralization with the Omicron variants (Table S1), but 4 of the 5 group 2 RBD bnAbs  
135 (CC25.4, CC25.17, CC25.43 and CC25.56) retained neutralization activities, albeit with  
136 IC<sub>50</sub>'s in the µg/ml range, against most or all of the variants tested. The IC<sub>50</sub> neutralization  
137 changes for these 4 group 2 RBD bnAbs against the SARS-CoV-2 Omicron variants were  
138 modest suggesting targeting of spike epitopes that are relatively more resistant to  
139 antibody immune escape. The BQ.1.1 variant displayed the most neutralization  
140 resistance to group 2 RBD bnAbs compared to the WT SARS-CoV-2 (12-fold drop in  
141 geometric mean IC<sub>50</sub>). Nevertheless, the neutralization activities of 4 group 2 RBD bnAbs  
142 remained largely unchanged against the XBB.1.5 variant (Table S1), which is the most  
143 dominant SARS-CoV-2 variant (85% infections) circulating in the United States as of April  
144 2023. As a comparison, we also tested 5 RBD nAbs that have been shown to target  
145 conserved RBD epitopes<sup>30,32,36,39,40</sup>. Except for class 3 RBD site bnAb, S309, which  
146 retained neutralization against the Omicron variants, all other nAbs lost neutralization with  
147 these highly resistant SARS-CoV-2 variants (Table S1).

148

149 Altogether, we noted that both group 1 and 2 RBD bnAbs, and particularly the group 2  
150 RBD bnAbs can effectively resist the extreme Omicron lineage antigenic drift and  
151 represent examples of human bnAbs that still retain substantial neutralizing activity with  
152 these highly evolved SARS-CoV-2 variants. These features support the potential  
153 utilization of group 1 and 2 RBD bnAbs in antibody-based interventions and as templates  
154 for variant-proof SARS-CoV-2 vaccines.

155

### 156 **Somatic hypermutation in RBD bnAbs is critical for neutralization of Omicron** 157 **lineage variants**

158

159 To investigate the role of antibody somatic hypermutation (SHM) in virus neutralization  
160 by group 1 and 2 RBD bnAbs, we generated inferred germline (iGL) versions by reverting  
161 their heavy and light chains to the corresponding germlines. The iGL heavy and light chain  
162 V, D and J regions were reverted back to their germline genes, while the non-templated  
163 N-additions at V/(D)/J junctions remained the same as in the mature bnAb versions, as  
164 described previously<sup>41</sup> (Figure 2A). It is not possible to revert the non-templated CDR3  
165 junctional regions in the iGLs and these regions may potentially contribute to  
166 neutralization. Therefore, the iGLs primarily allow us to assess the contribution of the  
167 SHMs in the templated V-D-J regions for neutralization. We evaluated the mature group  
168 1 and 2 RBD bnAbs and their iGL versions against SARS-CoV-2 variants. We noted that  
169 while many of the group 1 RBD bnAb iGLs retain neutralization with less mutated SARS-  
170 CoV-2 variants (Alpha, Beta, Gamma and Delta), they fail to neutralize the more evolved  
171 Omicron variants (Figure 2B and Table S1). In comparison the group 2 RBD bnAb iGLs



172 fail to neutralize any of the SARS-CoV-2 variants (Figure 2C and Table S1). We also  
173 tested these group 1 and group 2 RBD bnAbs and their iGLs with ACE2-utilizing clade 1b  
174 (Pang17) and clade 1a (SARS-CoV-1 and WIV1) sarbecoviruses <sup>42,43</sup>. We noted that,  
175 while most mature bnAbs neutralized these sarbecoviruses, as reported previously <sup>34</sup>,  
176 some iGLs of group 1 RBD bnAbs retained neutralization, especially with WIV1 and Pang  
177 17 (Table S1). These results suggest that human antibodies in their germline  
178 configurations are able to recognize these sarbecovirus spikes, as also noted by other  
179 studies <sup>44</sup>.

180

181 Overall, the findings suggest that germline residues in group 1 RBD bnAbs may contribute  
182 to neutralization of SARS-CoV-2 and its minimally mutated variants. However, SHMs for  
183 both group 1 and 2 RBD bnAbs are required to neutralize more evolved SARS-CoV-2  
184 Omicron lineage variants.

185

### 186 **Group 1 and 2 RBD bnAb memory B cells and potential recall boosts**

187

188 To investigate whether group 1 and 2 RBD bnAbs bind to SARS-CoV-2 Omicron BA.4/5  
189 spike and other clades of sarbecovirus spikes for potential boost considerations, we  
190 tested their binding to various spikes and their corresponding RBDs by BioLayer  
191 Interferometry (BLI). The BA.4/5 Omicron spike is a component of the current SARS-CoV-  
192 2 bivalent booster vaccines <sup>45,46</sup>. Therefore, we first assessed whether the group 1 and 2  
193 RBD bnAbs can bind to the BA.4/5 Omicron spike and whether their memory B cells are  
194 likely to be boosted by the current bivalent vaccines. As expected from the neutralization

195 results, both group 1 and 2 RBD bnAbs showed strong binding to the SARS-CoV-2 spike  
196 protein (Figure 2D-E and Table S2). Consistent with the neutralization of BA.4/5 Omicron  
197 variant above, the binding of group 1 RBD bnAbs was significantly reduced against the  
198 BA.4/5 Omicron spike (Figure 2D). Nevertheless, many group 1 RBD bnAbs, especially  
199 the ones that neutralize BA.4/5 variant still bound to its spike protein with high affinity  
200 (Figure 2D and Table S2). In comparison, the group 2 RBD bnAbs bound to BA.4/5  
201 Omicron spike equally efficiently (Figure 2E and Table S2). The findings suggest that  
202 majority of both group 1 and 2 RBD bnAbs are likely to be boosted with the BA.4/5 bivalent  
203 vaccine.

204

205 We further tested the binding by group 1 and 2 RBD bnAbs to spike proteins derived from  
206 heterologous clade 1a (SARS-CoV-1), clade 2 (RmYN02) and clade 3 (BM-4831)  
207 sarbecoviruses<sup>34,42,47</sup>. The group 1 RBD bnAb showed substantially reduced binding to  
208 SARS-CoV-1 and RmYN02 compared to the SARS-CoV-2 spike but the binding with  
209 sarbecovirus clade 3 BM-4831 spike was comparable (Figure 2D and Table S2). Most of  
210 the group 2 RBD bnAbs showed strong binding to the clade 2 (RmYN02) and clade 3  
211 (BM-4831) sarbecovirus spike-derived proteins (Figure 2E and Table S2). The results  
212 suggest that heterologous clades 2 and 3 spike-derived protein immunogens could be  
213 utilized to boost group 1 and 2 RBD bnAb responses, and specifically the clade 3 BM-  
214 4831 spike immunogen may recall group 1 RBD bnAb memory B cells more efficiently.  
215 We also tested the group 1 and 2 RBD bnAbs with RBD of SARS-CoV-2, BA.4/5 Omicron  
216 and the heterologous clade 1a, 2 and 3 sarbecoviruses (SARS-CoV-1, RmYN02 and BM-

217 4831). The binding responses were overall lower but largely consistent with  
218 corresponding spike binding with some exceptions (Figure 2D-E and Table S2).

219

220 Overall, we observed that the binding of group 1 RBD bnAbs with BA.4/5 Omicron and  
221 heterologous sarbecovirus spikes was substantially reduced as compared to the parental  
222 SARS-CoV-2 but binding by group 2 RBD bnAbs were comparable. Nevertheless, both  
223 groups of bnAbs are likely boostable by these spikes.

224

225 To gain more insight into the detailed binding modes of group 1 and 2 bnAbs, we selected  
226 four antibodies from group 1 and three antibodies from group 2 to perform detailed  
227 structural studies as described below.

228

229 **Structures of group 1 bnAbs complexed to SARS-CoV-2 RBD show a recurrent**  
230 **YYDRxG feature in CDRH3 and diverse light chain interactions**

231

232 Six of the 14 antibodies from group 1 RBD bnAbs shared the same YYDRxG motif  
233 encoded by IGHD3-22 that we and others previously identified <sup>34,48,49</sup>. These YYDRxG  
234 antibodies exhibited broad neutralization breadth against SARS-CoV-2 variants, including  
235 Omicron subvariants (Table S1). Two additional antibodies featuring a YYDSSG motif, a  
236 germline precursor of the YYDRxG motif <sup>48</sup>, showed cross-reactive binding to, but no  
237 neutralization of, Omicron variants.

238

239 To understand the basis for the superior breadth of YYDRxG antibodies, we determined  
240 crystal structures of three antibodies, CC25.54, CC84.24, and CC84.2, in complex with  
241 SARS-CoV-2 RBD with resolutions ranging from 2.9 to 3.1 Å (Figure 3A-C and Table S3).  
242 The structures revealed that the antibodies bind the CR3022 cryptic site using similar  
243 approach angles that allow them to compete with ACE2 binding even through there is no  
244 or minor epitope overlap (Figure 3D-E and Figure S1). The approach angle is also similar  
245 to that identified previously for YYDRxG antibodies<sup>10,48,49</sup>. Analysis of the buried surface  
246 area (BSA) on SARS-CoV-2 RBD by these antibodies using the PISA program found  
247 similar overall BSA, although the percentage of light chain BSA varies among different  
248 antibodies (Figure 3F and Figure S1). Further inspection of the antibody-antigen  
249 interactions showed variable contacts of the antibody light chains with SARS-CoV-2 RBD,  
250 while the heavy chain CDR3 maintained essentially the same contacts. The light chain of  
251 CC84.2 contributes a larger BSA compared to CC25.54 and CC84.24, involving CDRs  
252 L1 and L2 of the antibody (Figure 3F and Figure S2). Different germline genes encoding  
253 the light chains of these YYDRxG antibodies are responsible for the different interactions.  
254 CC84.2 is encoded by IGKV3-20, while CC25.54 and CC84.24 are encoded by IGLV3-  
255 21 and IGKV1-5, respectively.

256

257 **A YYDML motif enables group 1 RBD bnAb CC25.36 to bind SARS-CoV-2 RBD in a**  
258 **similar approach angle as YYDRxG antibodies.**

259

260 Another group 1 antibody, CC25.36, showed comparable breadth as the YYDRxG  
261 antibodies. The crystal structure of CC25.36 revealed that the antibody binds SARS-CoV-

262 2 RBD at the same CR3022 cryptic site on SARS-CoV-2 RBD, which appears less  
263 sensitive to mutations in Omicron strains (Figure 4A, Tables S1 and S2). Structural  
264 overlay illustrated that CC25.36 uses a similar approach angle to YYDRxG antibodies  
265 (Figure 4D). Further inspection showed that a YYDML motif in CC25.36 binds to  
266 approximately the same site as the YYDRxG motif in the other antibodies but with different  
267 interactions (Figure 4B and Figure S2). The <sub>99</sub>YY<sub>100</sub> dipeptide in the YYDML motif binds  
268 with similar interactions as in the YYDRxG motif, which probably determines the site  
269 specificity of antibody binding (Figure 4B); the other RBD interactions with CDRH3 differ  
270 from the YYDRxG antibodies. D100a forms internal hydrogen bonds with the backbone  
271 of <sub>100b</sub>ML<sub>100c</sub> as well as SARS-CoV-2 RBD K378. <sub>100b</sub>ML<sub>100c</sub> interacts with a hydrophobic  
272 patch formed by RBD Y369, F374, and F378. PISA analysis confirmed that the light chain  
273 of CC25.36 contributes a large BSA similar to CC84.2 (Figure 4C and Figure S2).  
274 Structural superimposition on SARS-CoV-2 RBD showed that the CC25.36 light chain is  
275 positioned in the same way as CC84.2, although the CC25.36 light chain is encoded by  
276 the IGLV1-40 gene. A homology search for the YYDML motif showed that YYDIL or  
277 YYDLL motifs, also encoded by IGHD3-9, are present in other SARS-CoV-2 antibodies,  
278 e.g., COV2-2258<sup>8</sup>, C531<sup>50</sup>, and C2179<sup>51</sup>. However, whether they bind to the same  
279 epitope as CC25.36 warrants further investigation by structural studies.

280

### 281 **Structural studies of group-2 RBD broadly neutralizing antibodies**

282 In our previous study of monoclonal antibodies from COVID-19 recovered-vaccinated  
283 donors<sup>34</sup>, the group-2 antibodies exhibited little or no competition with receptor binding  
284 site (RBS) antibodies. Group-2 antibodies showed impressive neutralization breadth

285 against sarbecoviruses including SARS-CoV-2, SARS-CoV-1, Pang17, WIV1, and  
286 SHC014<sup>34</sup>. Here we show that group 2 antibodies neutralize all SARS-CoV-2 variants to  
287 date, including Wuhan, early variants, and Omicron subvariants BA.1, BA.2, BA.5,  
288 BQ.1.1, and XBB.1.5 (Table S1). To understand the molecular basis of these broadly  
289 neutralizing antibodies, we determined crystal structures of SARS-CoV-2 RBD in complex  
290 with three group 2 antibodies, CC25.4, CC25.56 and CC25.43, at resolutions of 1.79 Å,  
291 2.84 Å, and 2.71 Å, respectively (Figure 5 and Table S3). The crystal structures revealed  
292 that all three antibodies target a cryptic region on the RBD immediately below the ridge  
293 region (Figure 5A). This site has been referred to as ‘site V’<sup>31</sup>, ‘left flank’<sup>52</sup>, or ‘E3’<sup>19</sup> in  
294 previous studies, and does not overlap with the RBS (Figure 5A) or compete with ACE2  
295 binding (Figures S2A and Figure S3).

296  
297 All three site V antibodies target the RBD using all six CDRs of their heavy and light chains  
298 (Figure 5A, 5B and Figure S4). For CC25.4 CDRs H1 and H2, V<sub>H</sub> T30 hydrogen bonds  
299 with RBD-R357, and V<sub>H</sub> D53 with RBD-N394. CDR H3 interacts extensively with the RBD  
300 (Figure 5B). For example, V<sub>H</sub> E97 makes a salt bridge with RBD-R466, and V<sub>H</sub> M100a  
301 and Y100d form hydrophobic and aromatic interactions with RBD-Y396, F429, P426, and  
302 F464. For the light chain, V<sub>L</sub> N31 and D93 engage RBD-K462 through a hydrogen bond  
303 and salt bridge and other HBs are made with V<sub>L</sub> N52 and K96 to the RBD (Figure 5B).  
304 For CC25.43, the heavy chain dominates the interaction with RBD and is responsible for  
305 82% of BSA. All three HCDR loops interact with RBD. RBD-R357 forms a CH-pi bond  
306 with V<sub>H</sub> Y100, whose main chain interacts with RBD-R355, which in turn forms a salt  
307 bridge with D398. RBD-R357 is also clamped by salt bridges to two acidic residues in the

308 light chain, V<sub>L</sub> D92, and D94. In CC25.56, CDRs H1 and H2 engage in extensive polar  
309 interactions with the RBD. V<sub>H</sub> R31 forms a salt bridge with RBD-D428, and K462 forms  
310 two salt bridges with V<sub>H</sub> D54 and D56. The hydrophobic tip of CDR H3 is comprised of V<sub>H</sub>  
311 I97, A98, and V99, which interact with RBD-W353 and F464. The light chain also forms  
312 extensive interactions with the RBD.

313  
314 RBDs on the SARS-CoV-2 S-protein flip between up and down conformations, where an  
315 RBD in the up conformation can engage with the host receptor ACE2, expose more  
316 epitope area, and also elicit antibodies specific to up-only conformations. In either up- or  
317 down-conformation, the S-protein can retain an intact pre-fusion state. However, our  
318 structures showed that the site V antibodies target a cryptic site on the RBD. Antibody  
319 binding to this epitope would clash with N-terminal domain (NTD) in the adjacent protomer  
320 of the S trimer, even if the RBD is in an up conformation when modeled on a pre-fusion  
321 SARS-CoV-2 S structure (Figure 5C). This observation suggests that binding of these site  
322 V antibodies may result in a conformational rearrangement of the RBD relative to the NTD  
323 in the S trimer in the pre-fusion state that could possibly affect viral entry.

324  
325 Most SARS-CoV-2 RBD antibodies target three regions: the RBS, the CR3022 site, and  
326 the S309 site (Figure 6A). Antibodies targeting the RBS generally exhibit higher frequency  
327 and higher neutralization potency due to direct competition with receptor <sup>29</sup>. Almost all  
328 commercially available therapeutic neutralizing antibodies (except for Sotrovimab) for  
329 COVID-19 treatment target the RBS. However, the RBS is highly variable among  
330 sarbecoviruses and SARS-CoV-2 variants (Figures 6A). In fact, all of these therapeutic

331 antibodies have now been evaded by at least one SARS-CoV-2 variant. Here we show  
332 that the epitope region of CC25.4, CC25.43, and CC25.56 is highly conserved among  
333 sarbecoviruses (Figures 6A-B). Indeed, epitope residues of CC25.4 and CC25.56 are  
334 100% conserved among all SARS-CoV-2 variants to date, while only one mutation  
335 (R346T) in BQ.1.1 and XBB.1.5 is located in the CC25.43 epitope (Figure 6B). The high  
336 conservation of site V explains the observation that antibodies that target this region  
337 largely retain neutralization activity against SARS-CoV-2 variants and other  
338 sarbecoviruses (Figure 1B and Table S1)<sup>34</sup>. In addition, in contrast to some other sites  
339 accommodating public antibodies, such as RBS-A targeted by IGHV3-53 and IGHV1-58  
340 antibodies<sup>6,53</sup>, RBS-B by IGHV1-2 antibodies<sup>6</sup>, RBS-D by IGHV2-5 antibodies<sup>6</sup>, and S2  
341 stem by IGHV1-46 antibodies<sup>54,55</sup>, IgBLAST analysis<sup>56</sup> showed that antibodies targeting  
342 site V are encoded by various germ lines and no public antibodies have yet been  
343 discovered (Figure 6C).

344  
345 To further determine the epitopes recognized by group 2 RBD bnAbs in the soluble spike,  
346 we employed single-particle negative stain electron microscopy to image the complexes  
347 of SARS-CoV-2 spike and bnAb Fabs (Figure 7). NsEM complexes revealed Fab-induced  
348 SARS-CoV-2 spike destabilization with CC25.43 resulting into 100% dimer particles while  
349 CC25.4 and CC25.56 showed an approximate 50/50 mix of spike dimer vs. trimer (Figure  
350 7A-C). Particles were unable to converge in 3D due to heterogeneity; therefore, we were  
351 unable to produce 3D maps of the spike-antibody complexes. Notably, from the CC25.56  
352 complex, we observed initial binding of antibody to the spike trimers, which quickly  
353 dissociated into dimers. Consistent with our crystallography structures, the EM studies



354 revealed that group 2 RBD bnAbs bind to a cryptic face of RBD to destabilize the spike  
355 trimer. The findings are suggestive of antibody mediated spike destabilization as putative  
356 mechanism of neutralization for group 2 RBD bnAbs.

357

## 358 **Discussion**

359

360 The emergence of antibody escape variants of the SARS-CoV-2 Omicron lineage has led  
361 to an urgent search for new bnAbs that target conserved spike epitopes. These bnAbs  
362 could be used in antibody-mediated prophylaxis or therapy and serve as templates for  
363 broad coronavirus vaccine strategies. In this study, we investigated the molecular basis  
364 of bnAbs that target conserved spike RBD sites, providing detailed information on the  
365 sites that resist virus escape. Our findings will aid in the design of pan-sarbecovirus  
366 vaccines.

367

368 Here, we revealed that YYDRxG antibodies from group 1 RBD bnAbs (i.e., CC25.54,  
369 CC84.24, and CC84.2) target the CR3022 conserved site using essentially the same  
370 approach angles as one another, consistent with our previous analysis<sup>48</sup>. The binding of  
371 these antibodies to SARS-CoV-2 RBD sterically clashes with ACE2 binding, although the  
372 epitope footprint of these antibodies does not overlap with the ACE2 footprint. The  
373 structures demonstrate that diverse light chains permit antibody neutralization. With more  
374 interactions between the light chain and SARS-CoV-2 RBD compared to CC25.54 and  
375 CC84.24, CC84.2 can neutralize VOCs without somatic hypermutation. We also  
376 determined the crystal structure of CC25.36, which binds SARS-CoV-2 with virtually the

377 same approach angle as YYDRxG antibodies and neutralized the virus using the same  
378 mechanism as those antibodies. Like CC84.2, the CC25.36 light chain has more contacts  
379 compared to CC25.54 and CC84.24, and its inferred germline version showed broad  
380 neutralization against VOCs. A newly observed binding motif, YYDML, encoded by  
381 IGHD3-9 in CC25.36 CDRH3, binds the same site as the YYDRxG motif but with distinct  
382 interactions, which could potentially be a shared motif targeting the CR3022 site.  
383 Homology sequence search revealed other potent SARS-CoV-2 RBD Abs, such as  
384 COV2-2258<sup>8</sup>, C531<sup>50</sup>, and C2179<sup>51</sup>, share the YYDIL or YYDLL sequences in CDRH3  
385 encoded by IGHD3-9. Further structural studies are needed to determine how similar the  
386 binding modes of these antibodies are to that of CC25.36, particularly comparisons of the  
387 interaction of YYDIL and YYDLL motifs and the YYDML motif of CC25.36. Overall,  
388 multiple antibody germline solutions of group 1 bnAbs converge to recognize a common  
389 conserved RBD bnAb site typified by class 4 epitope targeting mAb, CR3022.

390

391 In terms of group 1 RBD bnAb B cell precursors, immunogen design strategies could take  
392 advantage of the germline-encoded CDRH3 features for vaccine targeting that are  
393 described here<sup>57-61</sup>. One potential challenge is that the immunodominant class 1 and 2  
394 RBS nAbs responses may compete with the group 1 RBD bnAb responses. Accordingly,  
395 rational immunogen design may seek to effectively mask the RBS directed strain specific  
396 nAb responses, while still favorably exposing the RBD group 1 bnAb site to elicit the  
397 desired responses.

398

399 We also show that group 2 bnAbs, CC25.4, CC25.43, and CC25.56 target another highly  
400 conserved region of the RBD, namely site V, with very few mutations in this site in SARS-  
401 CoV-2 variants to date. This epitope region is juxtaposed to the neighboring NTD and  
402 likely stabilizes both the up and down conformations of the RBD. Structural and functional  
403 roles of this site may therefore be the cause of its extremely low variation. A few previously  
404 reported human neutralizing antibodies including S2H97<sup>31</sup>, COVOX-45<sup>52</sup>, 553-49<sup>62</sup>, and  
405 XMA09<sup>63</sup> also target this site (Figure S3C) and exhibit remarkably broad neutralization.  
406 RBD resurfacing strategies to mask the immunodominant B cell epitopes and  
407 immunofocus B cell responses to the site V may be rewarding to induce group 2 bnAb  
408 responses (refs).

409  
410 In addition to site V, some other highly conserved sites on SARS-CoV-2 S have been  
411 discovered to be targeted by neutralizing antibodies, including the S2 stem helix<sup>54,55,64-66</sup>  
412 and fusion peptide<sup>67-69</sup>. Although these sites are well conserved, and therefore can bind  
413 antibodies with high breadth, the neutralization potency of these antibodies is usually  
414 within the medium-to-low range, potentially due to their indirect neutralizing mechanisms  
415 or relative inaccessibility that may require conformational breathing or local  
416 rearrangements to permit antibody binding. Further affinity maturation may be required to  
417 confer higher neutralizing potency to these broad antibodies.

418  
419 Overall, our study presents a comprehensive molecular characterization of RBD bnAb  
420 epitopes, which can potentially serve as blueprints for the design of broad coronavirus  
421 vaccines.



423 **Reference:**

- 424
- 425 1. Wang, Z., Schmidt, F., Weisblum, Y., Muecksch, F., Barnes, C.O., Finkin, S., Schaefer-
- 426 Babajew, D., Cipolla, M., Gaebler, C., Lieberman, J.A., et al. (2021). mRNA vaccine-
- 427 elicited antibodies to SARS-CoV-2 and circulating variants. *Nature* 592, 616-622.
- 428 10.1038/s41586-021-03324-6.
- 429 2. Greaney, A.J., Loes, A.N., Gentles, L.E., Crawford, K.H.D., Starr, T.N., Malone, K.D.,
- 430 Chu, H.Y., and Bloom, J.D. (2021). Antibodies elicited by mRNA-1273 vaccination bind
- 431 more broadly to the receptor binding domain than do those from SARS-CoV-2 infection.
- 432 *Science translational medicine* 13, eabi9915. 10.1126/scitranslmed.abi9915.
- 433 3. Barnes, C.O., Jette, C.A., Abernathy, M.E., Dam, K.A., Esswein, S.R., Gristick, H.B.,
- 434 Malutin, A.G., Sharaf, N.G., Huey-Tubman, K.E., Lee, Y.E., et al. (2020). SARS-CoV-2
- 435 neutralizing antibody structures inform therapeutic strategies. *Nature* 588, 682-687.
- 436 10.1038/s41586-020-2852-1.
- 437 4. Barnes, C.O., West, A.P., Jr., Huey-Tubman, K.E., Hoffmann, M.A.G., Sharaf, N.G.,
- 438 Hoffman, P.R., Koranda, N., Gristick, H.B., Gaebler, C., Muecksch, F., et al. (2020).
- 439 Structures of Human Antibodies Bound to SARS-CoV-2 Spike Reveal Common Epitopes
- 440 and Recurrent Features of Antibodies. *Cell* 182, 828-842 e816.
- 441 10.1016/j.cell.2020.06.025.
- 442 5. Rogers, T.F., Zhao, F., Huang, D., Beutler, N., Burns, A., He, W.T., Limbo, O., Smith, C.,
- 443 Song, G., Woehl, J., et al. (2020). Isolation of potent SARS-CoV-2 neutralizing
- 444 antibodies and protection from disease in a small animal model. *Science* 369, 956-963.
- 445 10.1126/science.abc7520.
- 446 6. Yuan, M., Liu, H., Wu, N.C., Lee, C.D., Zhu, X., Zhao, F., Huang, D., Yu, W., Hua, Y.,
- 447 Tien, H., et al. (2020). Structural basis of a shared antibody response to SARS-CoV-2.
- 448 *Science* 369, 1119-1123. 10.1126/science.abd2321.
- 449 7. Robbiani, D.F., Gaebler, C., Muecksch, F., Lorenzi, J.C.C., Wang, Z., Cho, A., Agudelo,
- 450 M., Barnes, C.O., Gazumyan, A., Finkin, S., et al. (2020). Convergent antibody
- 451 responses to SARS-CoV-2 in convalescent individuals. *Nature* 584, 437-442.
- 452 10.1038/s41586-020-2456-9.
- 453 8. Zost, S.J., Gilchuk, P., Chen, R.E., Case, J.B., Reidy, J.X., Trivette, A., Nargi, R.S.,
- 454 Sutton, R.E., Suryadevara, N., Chen, E.C., et al. (2020). Rapid isolation and profiling of
- 455 a diverse panel of human monoclonal antibodies targeting the SARS-CoV-2 spike
- 456 protein. *Nature medicine* 26, 1422-1427. 10.1038/s41591-020-0998-x.
- 457 9. Brouwer, P.J.M., Caniels, T.G., van der Straten, K., Snitselaar, J.L., Aldon, Y., Bangaru,
- 458 S., Torres, J.L., Okba, N.M.A., Claireaux, M., Kerster, G., et al. (2020). Potent
- 459 neutralizing antibodies from COVID-19 patients define multiple targets of vulnerability.
- 460 *Science* 369, 643-650. 10.1126/science.abc5902.
- 461 10. Liu, H., and Wilson, I.A. (2022). Protective neutralizing epitopes in SARS-CoV-2.
- 462 *Immunological reviews* 310, 76-92. 10.1111/imr.13084.
- 463 11. Lopez Bernal, J., Gower, C., and Andrews, N. (2021). Effectiveness of Covid-19
- 464 Vaccines against the B.1.617.2 (Delta) Variant. Reply. *The New England journal of*
- 465 *medicine* 385, e92. 10.1056/NEJMc2113090.
- 466 12. Abu-Raddad, L.J., Chemaitelly, H., and Butt, A.A. (2021). Effectiveness of the
- 467 BNT162b2 Covid-19 Vaccine against the B.1.1.7 and B.1.351 Variants. *The New*
- 468 *England journal of medicine* 385, 187-189. 10.1056/NEJMc2104974.
- 469 13. Polack, F.P., Thomas, S.J., Kitchin, N., Absalon, J., Gurtman, A., Lockhart, S., Perez,
- 470 J.L., Pérez Marc, G., Moreira, E.D., Zerbini, C., et al. (2020). Safety and Efficacy of the
- 471 BNT162b2 mRNA Covid-19 Vaccine. *New England Journal of Medicine* 383, 2603-2615.
- 472 10.1056/NEJMoa2034577.

- 473 14. Baden, L.R., El Sahly, H.M., Essink, B., Kotloff, K., Frey, S., Novak, R., Diemert, D.,  
474 Spector, S.A., Rouphael, N., Creech, C.B., et al. (2020). Efficacy and Safety of the  
475 mRNA-1273 SARS-CoV-2 Vaccine. *New England Journal of Medicine* 384, 403-416.  
476 10.1056/NEJMoa2035389.
- 477 15. Wang, Q., Iketani, S., Li, Z., Liu, L., Guo, Y., Huang, Y., Bowen, A.D., Liu, M., Wang, M.,  
478 Yu, J., et al. (2023). Alarming antibody evasion properties of rising SARS-CoV-2 BQ and  
479 XBB subvariants. *Cell* 186, 279-286.e278. 10.1016/j.cell.2022.12.018.
- 480 16. Wang, Q., Guo, Y., Iketani, S., Nair, M.S., Li, Z., Mohri, H., Wang, M., Yu, J., Bowen,  
481 A.D., Chang, J.Y., et al. (2022). Antibody evasion by SARS-CoV-2 Omicron subvariants  
482 BA.2.12.1, BA.4 and BA.5. *Nature* 608, 603-608. 10.1038/s41586-022-05053-w.
- 483 17. Liu, L., Iketani, S., Guo, Y., Chan, J.F., Wang, M., Liu, L., Luo, Y., Chu, H., Huang, Y.,  
484 Nair, M.S., et al. (2022). Striking antibody evasion manifested by the Omicron variant of  
485 SARS-CoV-2. *Nature* 602, 676-681. 10.1038/s41586-021-04388-0.
- 486 18. Iketani, S., Liu, L., Guo, Y., Liu, L., Chan, J.F., Huang, Y., Wang, M., Luo, Y., Yu, J.,  
487 Chu, H., et al. (2022). Antibody evasion properties of SARS-CoV-2 Omicron  
488 sublineages. *Nature* 604, 553-556. 10.1038/s41586-022-04594-4.
- 489 19. Cao, Y., Yisimayi, A., Jian, F., Song, W., Xiao, T., Wang, L., Du, S., Wang, J., Li, Q.,  
490 Chen, X., et al. (2022). BA.2.12.1, BA.4 and BA.5 escape antibodies elicited by Omicron  
491 infection. *Nature* 608, 593-602. 10.1038/s41586-022-04980-y.
- 492 20. Cao, Y., Song, W., Wang, L., Liu, P., Yue, C., Jian, F., Yu, Y., Yisimayi, A., Wang, P.,  
493 Wang, Y., et al. (2022). Characterization of the enhanced infectivity and antibody  
494 evasion of Omicron BA.2.75. *Cell host & microbe* 30, 1527-1539.e1525.  
495 10.1016/j.chom.2022.09.018.
- 496 21. Cao, Y., Jian, F., Wang, J., Yu, Y., Song, W., Yisimayi, A., Wang, J., An, R., Chen, X.,  
497 Zhang, N., et al. (2023). Imprinted SARS-CoV-2 humoral immunity induces convergent  
498 Omicron RBD evolution. *Nature* 614, 521-529. 10.1038/s41586-022-05644-7.
- 499 22. Hachmann, N.P., Miller, J., Collier, A.Y., and Barouch, D.H. (2022). Neutralization  
500 Escape by SARS-CoV-2 Omicron Subvariant BA.4.6. *The New England journal of*  
501 *medicine* 387, 1904-1906. 10.1056/NEJMc2212117.
- 502 23. Planas, D., Saunders, N., Maes, P., Guivel-Benhassine, F., Planchais, C., Buchrieser,  
503 J., Bolland, W.H., Porrot, F., Staropoli, I., Lemoine, F., et al. (2022). Considerable  
504 escape of SARS-CoV-2 Omicron to antibody neutralization. *Nature* 602, 671-675.  
505 10.1038/s41586-021-04389-z.
- 506 24. Wang, Q., Li, Z., Ho, J., Guo, Y., Yeh, A.Y., Mohri, H., Liu, M., Wang, M., Yu, J., Shah,  
507 J.G., et al. (2022). Resistance of SARS-CoV-2 omicron subvariant BA.4.6 to antibody  
508 neutralisation. *Lancet Infect Dis* 22, 1666-1668. 10.1016/s1473-3099(22)00694-6.
- 509 25. Westendorf, K., Žentelis, S., Wang, L., Foster, D., Vaillancourt, P., Wiggin, M., Lovett,  
510 E., van der Lee, R., Hendle, J., Pustilnik, A., et al. (2022). LY-CoV1404 (bebtelovimab)  
511 potently neutralizes SARS-CoV-2 variants. *Cell reports* 39, 110812.  
512 10.1016/j.celrep.2022.110812.
- 513 26. Yuan, M., Huang, D., Lee, C.D., Wu, N.C., Jackson, A.M., Zhu, X., Liu, H., Peng, L., van  
514 Gils, M.J., Sanders, R.W., et al. (2021). Structural and functional ramifications of  
515 antigenic drift in recent SARS-CoV-2 variants. *Science* 373, 818-823.  
516 10.1126/science.abh1139.
- 517 27. Wang, Z., Muecksch, F., Schaefer-Babajew, D., Finkin, S., Viant, C., Gaebler, C.,  
518 Hoffmann, H.H., Barnes, C.O., Cipolla, M., Ramos, V., et al. (2021). Naturally enhanced  
519 neutralizing breadth against SARS-CoV-2 one year after infection. *Nature* 595, 426-431.  
520 10.1038/s41586-021-03696-9.
- 521 28. Yuan, M., Wu, N.C., Zhu, X., Lee, C.D., So, R.T.Y., Lv, H., Mok, C.K.P., and Wilson, I.A.  
522 (2020). A highly conserved cryptic epitope in the receptor binding domains of SARS-  
523 CoV-2 and SARS-CoV. *Science* 368, 630-633. 10.1126/science.abb7269.

- 524 29. Yuan, M., Zhu, X., He, W.T., Zhou, P., Kaku, C.I., Capozzola, T., Zhu, C.Y., Yu, X., Liu,  
525 H., Yu, W., et al. (2022). A broad and potent neutralization epitope in SARS-related  
526 coronaviruses. *Proceedings of the National Academy of Sciences of the United States of*  
527 *America* 119, e2205784119. [10.1073/pnas.2205784119](https://doi.org/10.1073/pnas.2205784119).
- 528 30. Li, D., Edwards, R.J., Manne, K., Martinez, D.R., Schafer, A., Alam, S.M., Wiehe, K., Lu,  
529 X., Parks, R., Sutherland, L.L., et al. (2021). In vitro and in vivo functions of SARS-CoV-  
530 2 infection-enhancing and neutralizing antibodies. *Cell* 184, 4203-4219 e4232.  
531 [10.1016/j.cell.2021.06.021](https://doi.org/10.1016/j.cell.2021.06.021).
- 532 31. Starr, T.N., Czudnochowski, N., Liu, Z., Zatta, F., Park, Y.J., Addetia, A., Pinto, D.,  
533 Beltramello, M., Hernandez, P., Greaney, A.J., et al. (2021). SARS-CoV-2 RBD  
534 antibodies that maximize breadth and resistance to escape. *Nature* 597, 97-102.  
535 [10.1038/s41586-021-03807-6](https://doi.org/10.1038/s41586-021-03807-6).
- 536 32. Pinto, D., Park, Y.J., Beltramello, M., Walls, A.C., Tortorici, M.A., Bianchi, S., Jaconi, S.,  
537 Culap, K., Zatta, F., De Marco, A., et al. (2020). Cross-neutralization of SARS-CoV-2 by  
538 a human monoclonal SARS-CoV antibody. *Nature* 583, 290-295. [10.1038/s41586-020-](https://doi.org/10.1038/s41586-020-2349-y)  
539 [2349-y](https://doi.org/10.1038/s41586-020-2349-y).
- 540 33. Rappazzo, C.G., Tse, L.V., Kaku, C.I., Wrapp, D., Sakharkar, M., Huang, D., Deveau,  
541 L.M., Yockachonis, T.J., Herbert, A.S., Battles, M.B., et al. (2021). Broad and potent  
542 activity against SARS-like viruses by an engineered human monoclonal antibody.  
543 *Science* 371, 823-829. [10.1126/science.abf4830](https://doi.org/10.1126/science.abf4830).
- 544 34. He, W.-t., Musharrafieh, R., Song, G., Dueker, K., Tse, L.V., Martinez, D.R., Schäfer, A.,  
545 Callaghan, S., Yong, P., Beutler, N., et al. (2022). Targeted isolation of diverse human  
546 protective broadly neutralizing antibodies against SARS-like viruses. *Nature immunology*  
547 23, 960-970. [10.1038/s41590-022-01222-1](https://doi.org/10.1038/s41590-022-01222-1).
- 548 35. He, W.-t., Yuan, M., Callaghan, S., Musharrafieh, R., Song, G., Silva, M., Beutler, N.,  
549 Lee, W.-H., Yong, P., Torres, J.L., et al. (2022). Broadly neutralizing antibodies to  
550 SARS-related viruses can be readily induced in rhesus macaques. *Science translational*  
551 *medicine* 14, eabl9605. [doi:10.1126/scitranslmed.abl9605](https://doi.org/10.1126/scitranslmed.abl9605).
- 552 36. Jette, C.A., Cohen, A.A., Gnanapragasam, P.N.P., Muecksch, F., Lee, Y.E., Huey-  
553 Tubman, K.E., Schmidt, F., Hatzioannou, T., Bieniasz, P.D., Nussenzweig, M.C., et al.  
554 (2021). Broad cross-reactivity across sarbecoviruses exhibited by a subset of COVID-19  
555 donor-derived neutralizing antibodies. *Cell reports* 36, 109760.  
556 [10.1016/j.celrep.2021.109760](https://doi.org/10.1016/j.celrep.2021.109760).
- 557 37. Martinez, D.R., Schafer, A., Gobeil, S., Li, D., De la Cruz, G., Parks, R., Lu, X., Barr, M.,  
558 Stalls, V., Janowska, K., et al. (2021). A broadly cross-reactive antibody neutralizes and  
559 protects against sarbecovirus challenge in mice. *Science translational medicine*,  
560 eabj7125. [10.1126/scitranslmed.abj7125](https://doi.org/10.1126/scitranslmed.abj7125).
- 561 38. Deshpande, A., Harris, B.D., Martinez-Sobrido, L., Kobie, J.J., and Walter, M.R. (2021).  
562 Epitope Classification and RBD Binding Properties of Neutralizing Antibodies Against  
563 SARS-CoV-2 Variants of Concern. *Frontiers in immunology* 12, 691715.  
564 [10.3389/fimmu.2021.691715](https://doi.org/10.3389/fimmu.2021.691715).
- 565 39. Tortorici, M.A., Czudnochowski, N., Starr, T.N., Marzi, R., Walls, A.C., Zatta, F., Bowen,  
566 J.E., Jaconi, S., Di Iulio, J., Wang, Z., et al. (2021). Broad sarbecovirus neutralization by  
567 a human monoclonal antibody. *Nature* 597, 103-108. [10.1038/s41586-021-03817-4](https://doi.org/10.1038/s41586-021-03817-4).
- 568 40. Wec, A.Z., Wrapp, D., Herbert, A.S., Maurer, D.P., Haslwanter, D., Sakharkar, M.,  
569 Jangra, R.K., Dieterle, M.E., Lilov, A., Huang, D., et al. (2020). Broad neutralization of  
570 SARS-related viruses by human monoclonal antibodies. *Science* 369, 731-736.  
571 [10.1126/science.abc7424](https://doi.org/10.1126/science.abc7424).
- 572 41. Andrabi, R., Pallesen, J., Allen, J.D., Song, G., Zhang, J., de Val, N., Gegg, G., Porter,  
573 K., Su, C.Y., Pauthner, M., et al. (2019). The Chimpanzee SIV Envelope Trimer:

- 574 Structure and Deployment as an HIV Vaccine Template. *Cell reports* 27, 2426-2441  
575 e2426. 10.1016/j.celrep.2019.04.082.
- 576 42. Letko, M., Marzi, A., and Munster, V. (2020). Functional assessment of cell entry and  
577 receptor usage for SARS-CoV-2 and other lineage B betacoronaviruses. *Nat Microbiol* 5,  
578 562-569. 10.1038/s41564-020-0688-y.
- 579 43. Menachery, V.D., Yount, B.L., Jr., Sims, A.C., Debbink, K., Agnihothram, S.S., Gralinski,  
580 L.E., Graham, R.L., Scobey, T., Plante, J.A., Royal, S.R., et al. (2016). SARS-like WIV1-  
581 CoV poised for human emergence. *Proceedings of the National Academy of Sciences of*  
582 *the United States of America* 113, 3048-3053. 10.1073/pnas.1517719113.
- 583 44. Feldman, J., Bals, J., Altomare, C.G., St Denis, K., Lam, E.C., Hauser, B.M., Ronsard,  
584 L., Sangesland, M., Moreno, T.B., Okonkwo, V., et al. (2021). Naive human B cells  
585 engage the receptor binding domain of SARS-CoV-2, variants of concern, and related  
586 sarbecoviruses. *Sci Immunol* 6, eabl5842. 10.1126/sciimmunol.abl5842.
- 587 45. Collier, A.-r.Y., Miller, J., Hachmann, N.P., McMahan, K., Liu, J., Bondzie, E.A., Gallup,  
588 L., Rowe, M., Schonberg, E., Thai, S., et al. (2023). Immunogenicity of BA.5 Bivalent  
589 mRNA Vaccine Boosters. *New England Journal of Medicine* 388, 565-567.  
590 10.1056/NEJMc2213948.
- 591 46. Chalkias, S., Harper, C., Vrbicky, K., Walsh, S.R., Essink, B., Brosz, A., McGhee, N.,  
592 Tomassini, J.E., Chen, X., Chang, Y., et al. (2022). A Bivalent Omicron-Containing  
593 Booster Vaccine against Covid-19. *New England Journal of Medicine* 387, 1279-1291.  
594 10.1056/NEJMoa2208343.
- 595 47. Cohen, A.A., Gnanapragasam, P.N.P., Lee, Y.E., Hoffman, P.R., Ou, S., Kakutani, L.M.,  
596 Keeffe, J.R., Wu, H.J., Howarth, M., West, A.P., et al. (2021). Mosaic nanoparticles elicit  
597 cross-reactive immune responses to zoonotic coronaviruses in mice. *Science*.  
598 10.1126/science.abf6840.
- 599 48. Liu, H., Kaku, C.I., Song, G., Yuan, M., Andrabi, R., Burton, D.R., Walker, L.M., and  
600 Wilson, I.A. (2022). Human antibodies to SARS-CoV-2 with a recurring YYDRxG motif  
601 retain binding and neutralization to variants of concern including Omicron. *Commun Biol*  
602 5, 766. 10.1038/s42003-022-03700-6.
- 603 49. Liu, L., Iketani, S., Guo, Y., Reddem, E.R., Casner, R.G., Nair, M.S., Yu, J., Chan, J.F.-  
604 W., Wang, M., Cerutti, G., et al. (2022). An antibody class with a common CDRH3 motif  
605 broadly neutralizes sarbecoviruses. *Science translational medicine* 14, eabn6859.  
606 doi:10.1126/scitranslmed.abn6859.
- 607 50. Gaebler, C., Wang, Z., Lorenzi, J.C.C., Muecksch, F., Finkin, S., Tokuyama, M., Cho, A.,  
608 Jankovic, M., Schaefer-Babajew, D., Oliveira, T.Y., et al. (2021). Evolution of antibody  
609 immunity to SARS-CoV-2. *Nature* 591, 639-644. 10.1038/s41586-021-03207-w.
- 610 51. Cho, A., Muecksch, F., Schaefer-Babajew, D., Wang, Z., Finkin, S., Gaebler, C., Ramos,  
611 V., Cipolla, M., Mendoza, P., Agudelo, M., et al. (2021). Anti-SARS-CoV-2 receptor-  
612 binding domain antibody evolution after mRNA vaccination. *Nature* 600, 517-522.  
613 10.1038/s41586-021-04060-7.
- 614 52. Dejnirattisai, W., Zhou, D., Ginn, H.M., Duyvesteyn, H.M.E., Supasa, P., Case, J.B.,  
615 Zhao, Y., Walter, T.S., Mentzer, A.J., Liu, C., et al. (2021). The antigenic anatomy of  
616 SARS-CoV-2 receptor binding domain. *Cell* 184, 2183-2200.e2122.  
617 10.1016/j.cell.2021.02.032.
- 618 53. Reincke, S.M., Yuan, M., Kornau, H.C., Corman, V.M., van Hoof, S., Sánchez-Sendin,  
619 E., Ramberger, M., Yu, W., Hua, Y., Tien, H., et al. (2022). SARS-CoV-2 Beta variant  
620 infection elicits potent lineage-specific and cross-reactive antibodies. *Science* 375, 782-  
621 787. 10.1126/science.abm5835.
- 622 54. Dacon, C., Peng, L., Lin, T.-H., Tucker, C., Lee, C.-C.D., Cong, Y., Wang, L., Purser, L.,  
623 Cooper, A.J.R., Williams, J.K., et al. (2022). Rare, convergent antibodies targeting the



- 624 stem helix broadly neutralize diverse betacoronaviruses. *Cell host & microbe*.  
625 <https://doi.org/10.1016/j.chom.2022.10.010>.
- 626 55. Zhou, P., Song, G., Liu, H., Yuan, M., He, W.-t., Beutler, N., Zhu, X., Tse, L.V., Martinez,  
627 D.R., Schäfer, A., et al. (2023). Broadly neutralizing anti-S2 antibodies protect against all  
628 three human betacoronaviruses that cause deadly disease. *Immunity*.  
629 10.1016/j.immuni.2023.02.005.
- 630 56. Ye, J., Ma, N., Madden, T.L., and Ostell, J.M. (2013). IgBLAST: an immunoglobulin  
631 variable domain sequence analysis tool. *Nucleic acids research* 41, W34-W40.  
632 10.1093/nar/gkt382.
- 633 57. Andrabi, R., Bhiman, J.N., and Burton, D.R. (2018). Strategies for a multi-stage  
634 neutralizing antibody-based HIV vaccine. *Curr Opin Immunol* 53, 143-151.  
635 10.1016/j.coi.2018.04.025.
- 636 58. Andrabi, R., Voss, J.E., Liang, C.H., Briney, B., McCoy, L.E., Wu, C.Y., Wong, C.H.,  
637 Poignard, P., and Burton, D.R. (2015). Identification of Common Features in Prototype  
638 Broadly Neutralizing Antibodies to HIV Envelope V2 Apex to Facilitate Vaccine Design.  
639 *Immunity* 43, 959-973. 10.1016/j.immuni.2015.10.014.
- 640 59. Steichen, J.M., Lin, Y.C., Havenar-Daughton, C., Pecetta, S., Ozorowski, G., Willis, J.R.,  
641 Toy, L., Sok, D., Liguori, A., Kratochvil, S., et al. (2019). A generalized HIV vaccine  
642 design strategy for priming of broadly neutralizing antibody responses. *Science* 366.  
643 10.1126/science.aax4380.
- 644 60. Willis, J.R., Berndsen, Z.T., Ma, K.M., Steichen, J.M., Schiffner, T., Landais, E., Liguori,  
645 A., Kalyuzhniy, O., Allen, J.D., Baboo, S., et al. (2022). Human immunoglobulin  
646 repertoire analysis guides design of vaccine priming immunogens targeting HIV V2-apex  
647 broadly neutralizing antibody precursors. *Immunity* 55, 2149-2167.e2149.  
648 10.1016/j.immuni.2022.09.001.
- 649 61. Gorman, J., Soto, C., Yang, M.M., Davenport, T.M., Guttman, M., Bailer, R.T.,  
650 Chambers, M., Chuang, G.Y., DeKosky, B.J., Doria-Rose, N.A., et al. (2016). Structures  
651 of HIV-1 Env V1V2 with broadly neutralizing antibodies reveal commonalities that enable  
652 vaccine design. *Nature structural & molecular biology* 23, 81-90. 10.1038/nsmb.3144.
- 653 62. Zhan, W., Tian, X., Zhang, X., Xing, S., Song, W., Liu, Q., Hao, A., Hu, Y., Zhang, M.,  
654 Ying, T., et al. (2022). Structural Study of SARS-CoV-2 Antibodies Identifies a Broad-  
655 Spectrum Antibody That Neutralizes the Omicron Variant by Disassembling the Spike  
656 Trimer. *Journal of virology* 96, e0048022. 10.1128/jvi.00480-22.
- 657 63. Wang, S., Sun, H., Zhang, Y., Yuan, L., Wang, Y., Zhang, T., Wang, S., Zhang, J., Yu,  
658 H., Xiong, H., et al. (2022). Three SARS-CoV-2 antibodies provide broad and synergistic  
659 neutralization against variants of concern, including Omicron. *Cell reports* 39, 110862.  
660 10.1016/j.celrep.2022.110862.
- 661 64. Hurlburt, N.K., Homad, L.J., Sinha, I., Jennewein, M.F., MacCamy, A.J., Wan, Y.H.,  
662 Boonyaratankornkit, J., Sholukh, A.M., Jackson, A.M., Zhou, P., et al. (2022). Structural  
663 definition of a pan-sarbecovirus neutralizing epitope on the spike S2 subunit. *Commun*  
664 *Biol* 5, 342. 10.1038/s42003-022-03262-7.
- 665 65. Pinto, D., Sauer, M.M., Czudnochowski, N., Low, J.S., Tortorici, M.A., Housley, M.P.,  
666 Noack, J., Walls, A.C., Bowen, J.E., Guarino, B., et al. (2021). Broad betacoronavirus  
667 neutralization by a stem helix-specific human antibody. *Science* 373, 1109-1116.  
668 10.1126/science.abj3321.
- 669 66. Zhou, P., Yuan, M., Song, G., Beutler, N., Shaabani, N., Huang, D., He, W.-t., Zhu, X.,  
670 Callaghan, S., Yong, P., et al. (2022). A human antibody reveals a conserved site on  
671 beta-coronavirus spike proteins and confers protection against SARS-CoV-2 infection.  
672 *Science translational medicine* 0, eabi9215. doi:10.1126/scitranslmed.abi9215.

- 673 67. Dacon, C., Tucker, C., Peng, L., Lee, C.D., Lin, T.H., Yuan, M., Cong, Y., Wang, L.,  
674 Purser, L., Williams, J.K., et al. (2022). Broadly neutralizing antibodies target the  
675 coronavirus fusion peptide. *Science* 377, 728-735. 10.1126/science.abq3773.
- 676 68. Sun, X., Yi, C., Zhu, Y., Ding, L., Xia, S., Chen, X., Liu, M., Gu, C., Lu, X., Fu, Y., et al.  
677 (2022). Neutralization mechanism of a human antibody with pan-coronavirus reactivity  
678 including SARS-CoV-2. *Nat Microbiol* 7, 1063-1074. 10.1038/s41564-022-01155-3.
- 679 69. Low, J.S., Jerak, J., Tortorici, M.A., McCallum, M., Pinto, D., Cassotta, A., Foglierini, M.,  
680 Mele, F., Abdelnabi, R., Weynand, B., et al. (2022). ACE2-binding exposes the SARS-  
681 CoV-2 fusion peptide to broadly neutralizing coronavirus antibodies. *Science* 377, 735-  
682 742. 10.1126/science.abq2679.
- 683 70. Sequences of 22 Sarbecoviruses including SARS-CoV-2, SARS-CoV and SARS-related  
684 coronaviruses (SARSr-CoVs) were used for this analysis: NCBI Reference Sequence  
685 YP\_009724390.1 (SARS-CoV-2) and variants Alpha, Beta, Gamma, Delta, Omicron  
686 BA.1, BA.2, BA.5, BQ.1.1, and XBB.1.5, GenBank ABF65836.1 (SARS-CoV), GenBank  
687 ALK02457.1 (Bat SARSr-CoV WIV16), GenBank AGZ48828.1 (Bat SARSr-CoV WIV1),  
688 GenBank ACU31032.1 (Bat SARSr-CoV Rs672), GenBank AIA62320.1 (Bat SARSr-  
689 CoV GX2013), GenBank AAZ67052.1 (Bat SARSr-CoV Rp3), GenBank AIA62300.1  
690 (Bat SARSr-CoV SX2013), GenBank ABD75323.1 (Bat SARSr-CoV Rf1), GenBank  
691 AIA62310.1 (Bat SARSr-CoV HuB2013), GenBank AAY88866.1 (Bat SARSr-CoV  
692 HKU3-1), GenBank AID16716.1 (Bat SARSr-CoV Longquan-140), GenBank  
693 AVP78031.1 (Bat SARSr-CoV ZC45), GenBank AVP78042.1 (Bat SARSr-CoV ZXC21),  
694 GenBank QHR63300.2 (Bat CoV RaTG13), NCBI Reference Sequence  
695 YP\_003858584.1 (Bat SARSr-CoV BM48-31), GISAID EPI\_ISL\_410721 (Pangolin-CoV  
696 Guangdong2019), GenBank QIA48632.1 (Pangolin-CoV Guangxi), GenBank  
697 AGZ48806.1 (Bat SARSr-CoV RsSHC0144), GenBank ATO98120.1 (Bat SARSr-CoV  
698 Rs4081), GenBank AGC74176.1 (Bat SARSr-CoV Yun11), GenBank APO40579.1 (Bat  
699 SARSr-CoV BtKY72).
- 700 71. Walls, A.C., Park, Y.-J., Tortorici, M.A., Wall, A., McGuire, A.T., and Velesler, D. (2020).  
701 Structure, Function, and Antigenicity of the SARS-CoV-2 Spike Glycoprotein. *Cell* 181,  
702 281-292.e286. 10.1016/j.cell.2020.02.058.
- 703 72. Lv, H., Wu, N.C., Tsang, O.T., Yuan, M., Perera, R., Leung, W.S., So, R.T.Y., Chan,  
704 J.M.C., Yip, G.K., Chik, T.S.H., et al. (2020). Cross-reactive Antibody Response  
705 between SARS-CoV-2 and SARS-CoV Infections. *Cell reports* 31, 107725.  
706 10.1016/j.celrep.2020.107725.
- 707 73. Liu, H., Wu, N.C., Yuan, M., Bangaru, S., Torres, J.L., Caniels, T.G., van Schooten, J.,  
708 Zhu, X., Lee, C.D., Brouwer, P.J.M., et al. (2020). Cross-Neutralization of a SARS-CoV-  
709 2 Antibody to a Functionally Conserved Site Is Mediated by Avidity. *Immunity* 53, 1272-  
710 1280.e1275. 10.1016/j.immuni.2020.10.023.
- 711 74. Ekiert, D.C., Friesen, R.H., Bhabha, G., Kwaks, T., Jongeneelen, M., Yu, W., Ophorst,  
712 C., Cox, F., Korse, H.J., Brandenburg, B., et al. (2011). A highly conserved neutralizing  
713 epitope on group 2 influenza A viruses. *Science* 333, 843-850.  
714 10.1126/science.1204839.
- 715 75. Bailey, L.J., Sheehy, K.M., Dominik, P.K., Liang, W.G., Rui, H., Clark, M., Jaskolowski,  
716 M., Kim, Y., Deneka, D., Tang, W.J., and Kossiakoff, A.A. (2018). Locking the Elbow:  
717 Improved Antibody Fab Fragments as Chaperones for Structure Determination. *Journal*  
718 *of molecular biology* 430, 337-347. 10.1016/j.jmb.2017.12.012.
- 719 76. Lieu, R., Antonysamy, S., Druzina, Z., Ho, C., Kang, N.R., Pustilnik, A., Wang, J., and  
720 Atwell, S. (2020). Rapid and robust antibody Fab fragment crystallization utilizing edge-  
721 to-edge beta-sheet packing. *PloS one* 15, e0232311. 10.1371/journal.pone.0232311.

- 722 77. Vonrhein, C., Flensburg, C., Keller, P., Sharff, A., Smart, O., Paciorek, W., Womack, T.,  
723 and Bricogne, G. (2011). Data processing and analysis with the autoPROC toolbox. *Acta*  
724 *Crystallogr D Biol Crystallogr* *67*, 293-302. 10.1107/s0907444911007773.
- 725 78. McCoy, A.J., Grosse-Kunstleve, R.W., Adams, P.D., Winn, M.D., Storoni, L.C., and  
726 Read, R.J. (2007). Phaser crystallographic software. *J Appl Crystallogr* *40*, 658-674.  
727 10.1107/s0021889807021206.
- 728 79. Emsley, P., Lohkamp, B., Scott, W.G., and Cowtan, K. (2010). Features and  
729 development of Coot. *Acta Crystallogr D Biol Crystallogr* *66*, 486-501.  
730 10.1107/s0907444910007493.
- 731 80. Adams, P.D., Afonine, P.V., Bunkóczi, G., Chen, V.B., Davis, I.W., Echols, N., Headd,  
732 J.J., Hung, L.W., Kapral, G.J., Grosse-Kunstleve, R.W., et al. (2010). PHENIX: a  
733 comprehensive Python-based system for macromolecular structure solution. *Acta*  
734 *Crystallogr D Biol Crystallogr* *66*, 213-221. 10.1107/s0907444909052925.
- 735 81. Krissinel, E., and Henrick, K. (2007). Inference of macromolecular assemblies from  
736 crystalline state. *Journal of molecular biology* *372*, 774-797. 10.1016/j.jmb.2007.05.022.
- 737 82. Scheres, S.H. (2012). RELION: implementation of a Bayesian approach to cryo-EM  
738 structure determination. *J Struct Biol* *180*, 519-530. 10.1016/j.jsb.2012.09.006.
- 739 83. Pettersen, E.F., Goddard, T.D., Huang, C.C., Meng, E.C., Couch, G.S., Croll, T.I.,  
740 Morris, J.H., and Ferrin, T.E. (2021). UCSF ChimeraX: Structure visualization for  
741 researchers, educators, and developers. *Protein Science* *30*, 70-82.  
742 <https://doi.org/10.1002/pro.3943>.
- 743 84. Chen, V.B., Arendall, W.B., 3rd, Headd, J.J., Keedy, D.A., Immormino, R.M., Kapral,  
744 G.J., Murray, L.W., Richardson, J.S., and Richardson, D.C. (2010). MolProbity: all-atom  
745 structure validation for macromolecular crystallography. *Acta Crystallogr D Biol*  
746 *Crystallogr* *66*, 12-21. 10.1107/s0907444909042073.
- 747  
748  
749

750 **Acknowledgements**

751 This work was supported by National Institutes of Health-(NIH), National Institute of  
752 Allergy and Infectious Diseases-(NIAID) awards, R01AI170928 (R.A.) and CHAVD UM1  
753 AI44462 (D.R.B.) and the Bill and Melinda Gates Foundation INV-004923 (I.A.W.,  
754 D.R.B.). We thank Henry Tien for technical support with the crystallization robot, and  
755 Wenli Yu for protein production. We are grateful to the staff of the Stanford Synchrotron  
756 Radiation Lightsource (SSRL) beamlines 12-1 and Advanced Photon Source (APS)  
757 beamline 23-ID-B and 23-ID-D for assistance. This research used resources of the SSRL,  
758 SLAC National Accelerator Laboratory, which is supported by the U.S. Department of  
759 Energy, Office of Science, Office of Basic Energy Sciences under Contract No. DE-  
760 AC02-76SF00515. The SSRL Structural Molecular Biology Program is supported by the  
761 DOE Office of Biological and Environmental Research, and by the National Institutes of  
762 Health, National Institute of General Medical Sciences (including P41GM103393). This  
763 research also used resources of the Advanced Photon Source, a U.S. Department of  
764 Energy (DOE) Office of Science User Facility, operated for the DOE Office of Science by  
765 Argonne National Laboratory under Contract No. DE-AC02-06CH11357. Extraordinary  
766 facility operations were supported in part by the DOE Office of Science through the  
767 National Virtual Biotechnology Laboratory, a consortium of DOE national laboratories  
768 focused on the response to COVID-19, with funding provided by the Coronavirus CARES  
769 Act.

770

771 **Author contributions**

772 G.S., M.Y., H.L., T.C., D.R.B., I.A.W. and R.A. conceived and designed the study. G.S.,  
773 T.C., W.H., R.M., K.D., P.Z., S.C., N.M., P.Y., F.A., G.A., A.L.V., X.L., M.M. and L.P.  
774 performed BLI, virus preparation, neutralization, and characterization of monoclonal  
775 antibodies. Y.S. and B.B performed immunogenetic analysis of antibodies. M.Y., H.L.,  
776 and Z.F. crystallized the antibody-antigen complexes and determined the crystal  
777 structures. M.Y. and H.L., collected X-ray data. M.Y., H.L., X.Z. and I.A.W. analyzed the  
778 structural data. R.N.L. and J.L.T. conducted the negative stain electron microscopy  
779 studies. G.S., M.Y., H.L., T.C., R.N.L., J.L.T., W.H., R.M., K.D., P.Z., S.C., N.M., P.Y.,  
780 F.A., G.A., A.L.V., X.L., M.M., Z.F., X.Z., L.P., D.N., Y.S., B.B., A.B.W., D.R.B., I.A.W. and  
781 R.A. designed the experiments and/or analyzed the data. G.S., M.Y., H.L., T.C., D.R.B.,  
782 I.A.W. and R.A. wrote the paper, and all authors reviewed and edited the paper.

783

784 **Declaration of interests**

785 G.S., W.H., P.Z., S.C., R.M., K.D., D.R.B. and R.A. are listed as inventors on pending  
786 patent applications describing the betacoronavirus broadly neutralizing antibodies. All  
787 other authors have no competing interests to declare.

788

789 **Key Resource Table**

| REAGENT or RESOURCE                                  | SOURCE              | IDENTIFIER |
|------------------------------------------------------|---------------------|------------|
| <b>Chemicals, Peptides, and Recombinant Proteins</b> |                     |            |
| NEBuilder® HiFi DNA Assembly Master Mix              | New England Biolabs | #E2621L    |
| 40 K polyethylenimine (PEI)                          | Polysciences        | #24765-1   |
| FectoPRO                                             | Polyplus            | #116-001   |

|                                                 |                                    |                                                                                                                       |
|-------------------------------------------------|------------------------------------|-----------------------------------------------------------------------------------------------------------------------|
| Lipofectamine 2000                              | ThermoFisher Scientific            | #11668019                                                                                                             |
| Valproic acid sodium salt                       | Sigma                              | # P4543-100G                                                                                                          |
| 45% D-(+)-Glucose Solution                      | Sigma                              | # G8769-100ML                                                                                                         |
| L-glutamine                                     | Corning                            | # 25-005-CI                                                                                                           |
| Penicillin-streptomycin                         | Corning                            | # 30-002-CI                                                                                                           |
| DEAE-dextran                                    | Sigma-Aldrich                      | # 93556-1G                                                                                                            |
| SARS-CoV-2 and VOCs spike and RBD proteins      | In house                           | N/A                                                                                                                   |
| SARS-CoV-1, YN02, BM4831 spike and RBD proteins | In house                           | N/A                                                                                                                   |
| Bright-Glo Luciferase Assay System              | Promega                            | #E2620                                                                                                                |
| Papain                                          | Sigma-Aldrich                      | #P3125                                                                                                                |
| <b>Deposited Data</b>                           |                                    |                                                                                                                       |
| Structure of CC25.36 + SARS-CoV-2 RBD complex   | RCSB PDB                           | 8SIQ                                                                                                                  |
| Structure of CC25.54 + SARS-CoV-2 RBD complex   | RCSB PDB                           | 8SIR                                                                                                                  |
| Structure of CC84.2 + SARS-CoV-2 RBD complex    | RCSB PDB                           | 8SIS                                                                                                                  |
| Structure of CC84.24 + SARS-CoV-2 RBD complex   | RCSB PDB                           | 8SIT                                                                                                                  |
| Structure of CC25.4 + SARS-CoV-2 RBD complex    | RCSB PDB                           | 8SDF                                                                                                                  |
| Structure of CC25.43 + SARS-CoV-2 RBD complex   | RCSB PDB                           | 8SDG                                                                                                                  |
| Structure of CC25.56 + SARS-CoV-2 RBD complex   | RCSB PDB                           | 8SDH                                                                                                                  |
| <b>Experimental Models: Cell Lines</b>          |                                    |                                                                                                                       |
| FreeStyle293-F cells                            | Thermo Fisher Scientific           | #R79007                                                                                                               |
| Expi293F cells                                  | Gibco                              | #A14527                                                                                                               |
| 293T cells                                      | ATCC                               | # CRL-3216                                                                                                            |
| HeLa-ACE2 cells                                 | In house                           | N/A                                                                                                                   |
| <b>Recombinant DNA</b>                          |                                    |                                                                                                                       |
| phCMV3                                          | Genlantis                          | #P003300                                                                                                              |
| pBOB-hACE2                                      | In house                           | N/A                                                                                                                   |
| SARS-CoV-2 6P Mut7                              | In House                           | N/A                                                                                                                   |
| <b>Software and Algorithms</b>                  |                                    |                                                                                                                       |
| V-Quest online tool                             | IMGT                               | <a href="http://www.imgt.org">http://www.imgt.org</a>                                                                 |
| Prism 8                                         | GraphPad                           | <a href="https://www.graphpad.com/scientific-software/prism/">https://www.graphpad.com/scientific-software/prism/</a> |
| ForteBio Data Analysis software                 | Sartorius                          | <a href="https://www.sartorius.com/en">https://www.sartorius.com/en</a>                                               |
| PyMOL V2.4.2                                    | PyMOL by Schrödinger               | <a href="https://pymol.org">https://pymol.org</a>                                                                     |
| HKL2000                                         | DOI: 10.1016/S0076-6879(97)76066-X | N/A                                                                                                                   |

|                                                                              |                                       |                                                                                                                                                                                                                                     |
|------------------------------------------------------------------------------|---------------------------------------|-------------------------------------------------------------------------------------------------------------------------------------------------------------------------------------------------------------------------------------|
| AutoPROC                                                                     | DOI:<br>10.1107/S090744491<br>1007773 | N/A                                                                                                                                                                                                                                 |
| Phaser                                                                       | DOI:<br>10.1107/S002188980<br>7021206 | N/A                                                                                                                                                                                                                                 |
| Coot                                                                         | DOI:<br>10.1107/S090744491<br>0007493 | N/A                                                                                                                                                                                                                                 |
| MolProbity                                                                   | DOI:<br>10.1107/S090744490<br>9042073 | N/A                                                                                                                                                                                                                                 |
| RELION 3.1                                                                   | SciLifeLab                            | <a href="https://relion.readthedocs.io/en/release-4.0/">https://relion.readthedocs.io/en/release-4.0/</a>                                                                                                                           |
| EPU                                                                          | Thermo Fisher                         | <a href="https://www.thermofisher.com/us/en/home/electron-microscopy/products/software-em-3d-vis/eput-software.html">https://www.thermofisher.com/us/en/home/electron-microscopy/products/software-em-3d-vis/eput-software.html</a> |
| ChimeraX                                                                     | UCSF                                  | <a href="https://www.rbvi.ucsf.edu/chimerax/">https://www.rbvi.ucsf.edu/chimerax/</a>                                                                                                                                               |
| <b>Other</b>                                                                 |                                       |                                                                                                                                                                                                                                     |
| FreeStyle293 Expression Medium                                               | Gibco                                 | #12338018                                                                                                                                                                                                                           |
| Expi293 Expression Medium                                                    | Gibco                                 | #A1435101                                                                                                                                                                                                                           |
| DMEM                                                                         | Corning                               | #10-017-CV                                                                                                                                                                                                                          |
| FBS                                                                          | Omega Scientific                      | #NC0471611                                                                                                                                                                                                                          |
| Transfectagro™                                                               | Corning                               | #40-300-CV                                                                                                                                                                                                                          |
| Opti-MEM™                                                                    | Thermo Fisher Scientific              | #31985070                                                                                                                                                                                                                           |
| 0.2 um membrane filters                                                      | Fisher Scientific                     | #564-0020                                                                                                                                                                                                                           |
| Steriflip™ Vacuum Filter Units                                               | MilliporeSigma                        | #SCGP00525                                                                                                                                                                                                                          |
| HisPur Ni-NTA Resin                                                          | Thermo Fisher Scientific              | #88221                                                                                                                                                                                                                              |
| Superdex 200 Increase10/300 GL column                                        | GE Healthcare                         | #GE28-9909-44                                                                                                                                                                                                                       |
| Praesto Protein A Affinity Chromatography Resin                              | Purolite                              | # PR00300-164                                                                                                                                                                                                                       |
| Protein G Sepharose                                                          | GE Healthcare                         | #45000118                                                                                                                                                                                                                           |
| Econo-Pac columns                                                            | BioRad                                | #7321010                                                                                                                                                                                                                            |
| StrepTactin XT 4FLOW                                                         | IBA Life Sciences                     | #2-5010-025                                                                                                                                                                                                                         |
| Amicon tubes (100K, 30K, 10K)                                                | Millipore                             | #UFC9100,<br>#UFC9030,<br>#UFC9010                                                                                                                                                                                                  |
| Bio-One Polypropylene 96-well F-Bottom Microplates                           | Greiner                               | #655209                                                                                                                                                                                                                             |
| Anti-human IgG Fc capture (AHC) biosensors                                   | ForteBio                              | #18-5060                                                                                                                                                                                                                            |
| 96 Half Area Well Solid White Flat Bottom Polystyrene TC-treated Microplates | Corning                               | #3688                                                                                                                                                                                                                               |

|                             |               |        |
|-----------------------------|---------------|--------|
| Pierce™ Fab Preparation Kit | Thermo Fisher | #44985 |
|-----------------------------|---------------|--------|

790

791 **Resource Availability**

792 **Lead contact**

793 Further information and requests for resources and reagents should be directed to and  
794 will be fulfilled by the lead contact, Raiees Andrabi (andrabi@scripps.edu)

795

796 **Materials availability**

797 Upon specific request and execution of a material transfer agreement (MTA) from The  
798 Scripps Research Institute to the Lead Contact, Antibody plasmids will be made available.

799

800 **Data and code availability**

801 The data supporting the findings of this study are available within the published article  
802 and summarized in the corresponding tables, figures, and supplemental materials.  
803 Inferred germline antibody sequences have been deposited in GenBank under accession  
804 numbers XXXX-XXXX. X-ray coordinates and structure factors have been deposited in  
805 the RCSB Protein Data Bank under accession codes 8SIQ, 8SIR, 8SIS, 8SIT, 8SDF,  
806 8SDG, and 8SDH.

807

808 **Figures and legends**

809

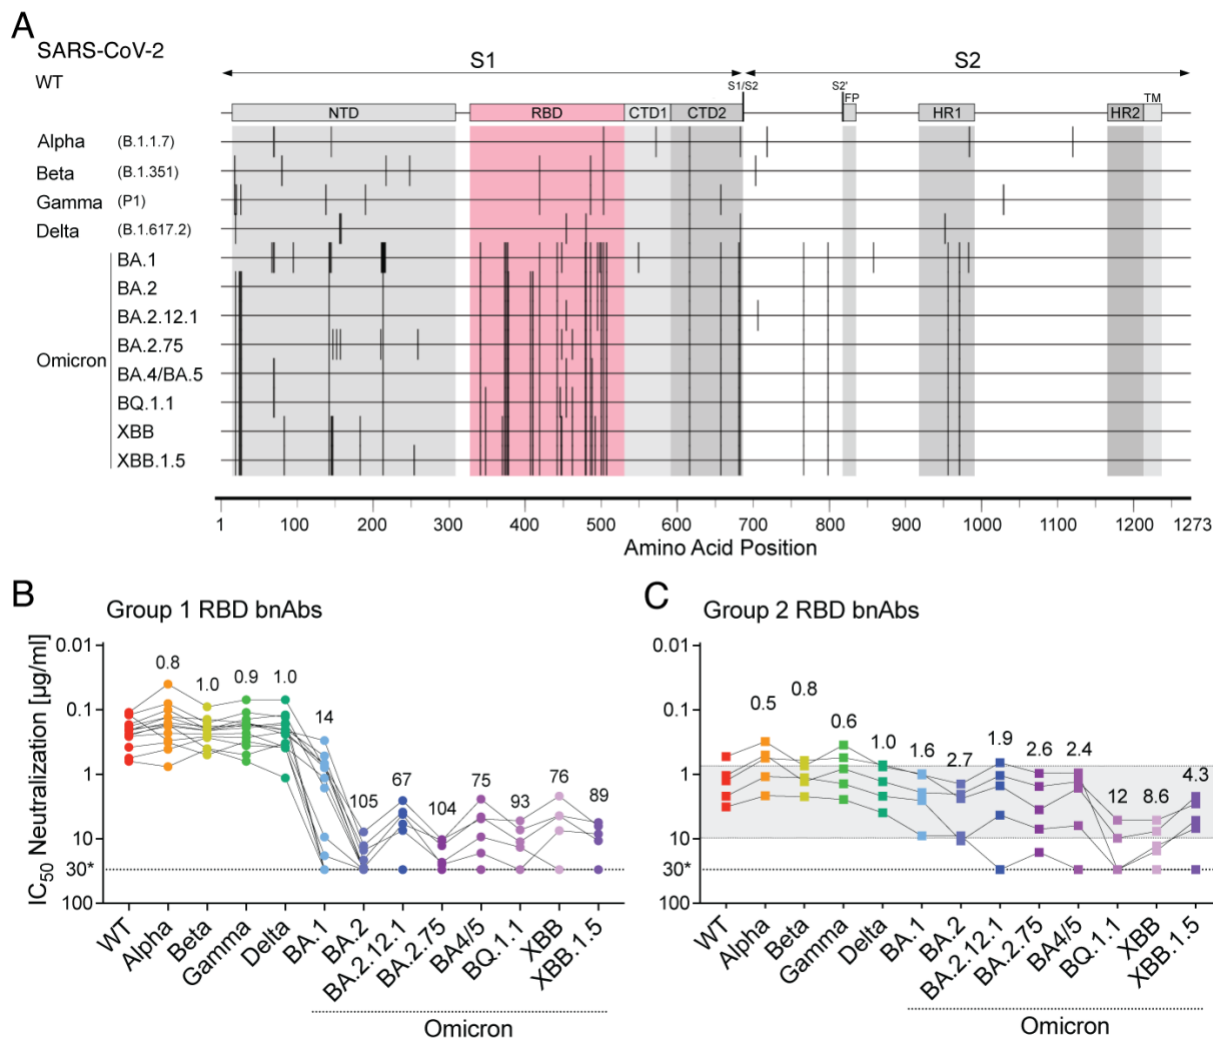

810

811 **Figure 1. Neutralization of SARS-CoV-2 variants by RBD human broadly**

812 **neutralizing antibodies.**

813 **A.** Schematic showing amino acid sequence alignment of SARS-CoV-2 spike region

814 across 12 VOCs including Alpha (B.1.1.7), Beta (B.1.351), Gamma (P.1), Delta

815 (B.1.617.2), Omicron subvariants BA.1, BA.2, BA.2.12.1, BA.2.75, BA.4/BA.5, BQ.1.1,

816 XBB, and XBB.1.5. Vertical lines indicated mismatches compared to SARS-CoV-2 WT

817 (Wuhan). Amino acid positions are illustrated at the bottom, S1 and S2 subunits are

818 shown by arrowed lines at the top. Different domains are indicated (NTD, N-terminal

819 domain; RBD, receptor-binding domain; CTD1, C-terminal domain 1; CTD2, C-terminal

820 domain 2; S1/S2, S1/S2 furin cleavage site; S2', S2' TMPRSS2 or cathepsin B/L cleavage

821 site; FP, fusion peptide; HR1, heptad repeat 1; HR2, heptad repeat 2; TM,

822 transmembrane anchor), with the RBD region highlighted in red, containing the majority

823 of the mutations.

824 **B-C.** Neutralization IC<sub>50</sub> of RBD bnAbs from group 1 (**B**) and group 2 (**C**) for the panel of

825 SARS-CoV-2 WT and variants. Each variant is indicated by a different color. Round data

826 points represent group 1 RBD bnAbs, square data points represent group 2 RBD bnAbs.



827 The dotted line shows the limit of antibody dilution (30 $\mu$ g/ml). Values above each column  
828 indicate fold change of IC<sub>50</sub>s against each variant in comparison with WT. The grey  
829 shaded area highlights the bnAbs in group 2 showing relatively consistent neutralization  
830 IC<sub>50</sub> across SARS-CoV-2 WT and variants.  
831

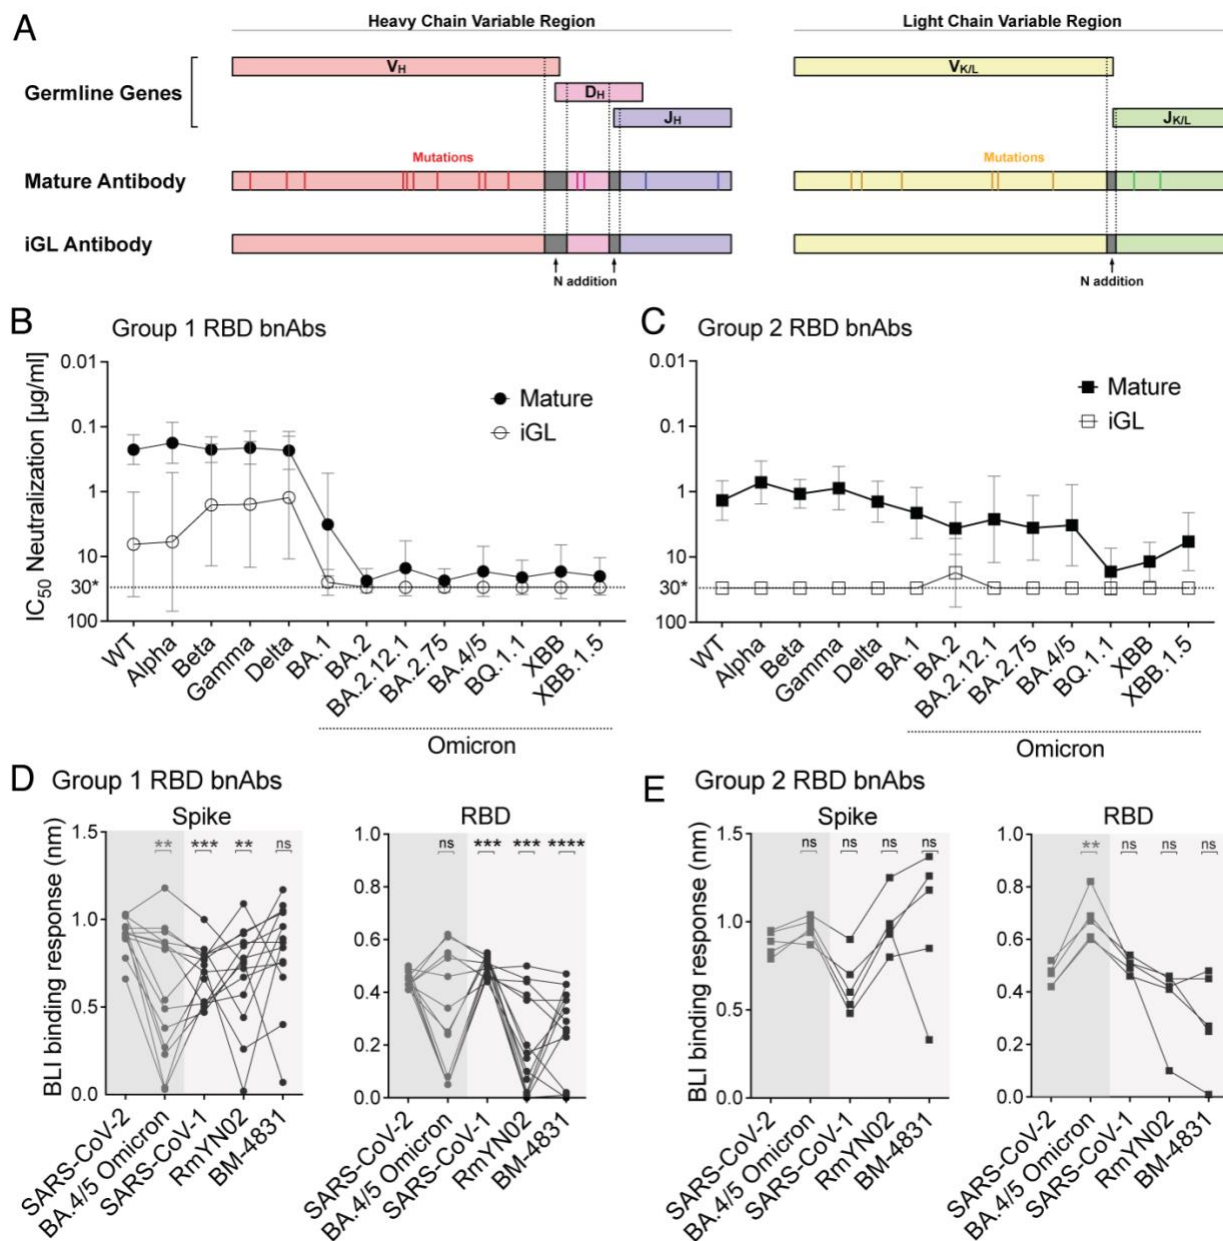

832  
833 **Figure 2. Neutralization and binding of mature RBD bnAbs and their inferred**  
834 **germline (iGL) versions against SARS-CoV-2 VOCs and other sarbecoviruses.**

835 **A.** Schematic showing design of inferred germline versions of bnAbs based on mature  
836 antibody heavy chain (left) and light chain (right) variable region sequences. The V/D/J  
837 genes of heavy chains (V<sub>H</sub>, D<sub>H</sub>, J<sub>H</sub>) and V/J genes of kappa or lambda light chains (V<sub>K/L</sub>,  
838 J<sub>K/L</sub>) were reverted to their corresponding germlines (IMGT/V-QUEST tool). The  
839 mutations represented by vertical lines were eliminated in the inferred germline antibody  
840 sequences. The non-templated N additions between V/(D)/J, indicated as dark grey,  
841 remained the same as in the mature antibody.

842 **B-C.** Average neutralization IC<sub>50</sub> values of all group 1 (B) and group 2 (C) RBD bnAbs  
843 comparing the mature antibody (bold) to their inferred germ line versions (open) tested  
844 with pseudotyped versions of SARS-CoV-2 WT (Wuhan) and 12 VOCs including Alpha  
845 (B.1.1.7), Beta (B.1.351), Gamma (P.1), Delta (B.1.617.2), Omicron subvariants BA.1,

846 BA.2, BA.2.12.1, BA.2.75, BA.4/5, BQ.1.1, XBB, and XBB.1.5. Round data points  
847 represent group 1 RBD bnAbs, square data points represented group 2 RBD bnAbs. Each  
848 data point represents the geometric mean  $\pm$  geometric SD of neutralization IC<sub>50</sub> for  
849 specific variants by all bnAbs within the corresponding group (n = 14 for group 1, n = 5  
850 for group 2).

851 **D-E.** BLI binding response (nm) of group 1 (D) and group 2 (E) RBD bnAbs to the trimeric  
852 stabilized spike proteins and monomeric RBD proteins of SARS-CoV-2 (Wuhan and  
853 BA.4/5), clade 1b SARS-CoV-1, clade 2 RmYN02, and clade 3 BM-4831 sarbecoviruses.  
854 Statistical comparisons between groups were performed using a two-tailed Mann-  
855 Whitney U-test (ns: p >0.05, \*: p < 0.05, \*\*: p < 0.005, \*\*\*: p < 0.001, \*\*\*\*: p < 0.0001).  
856

857

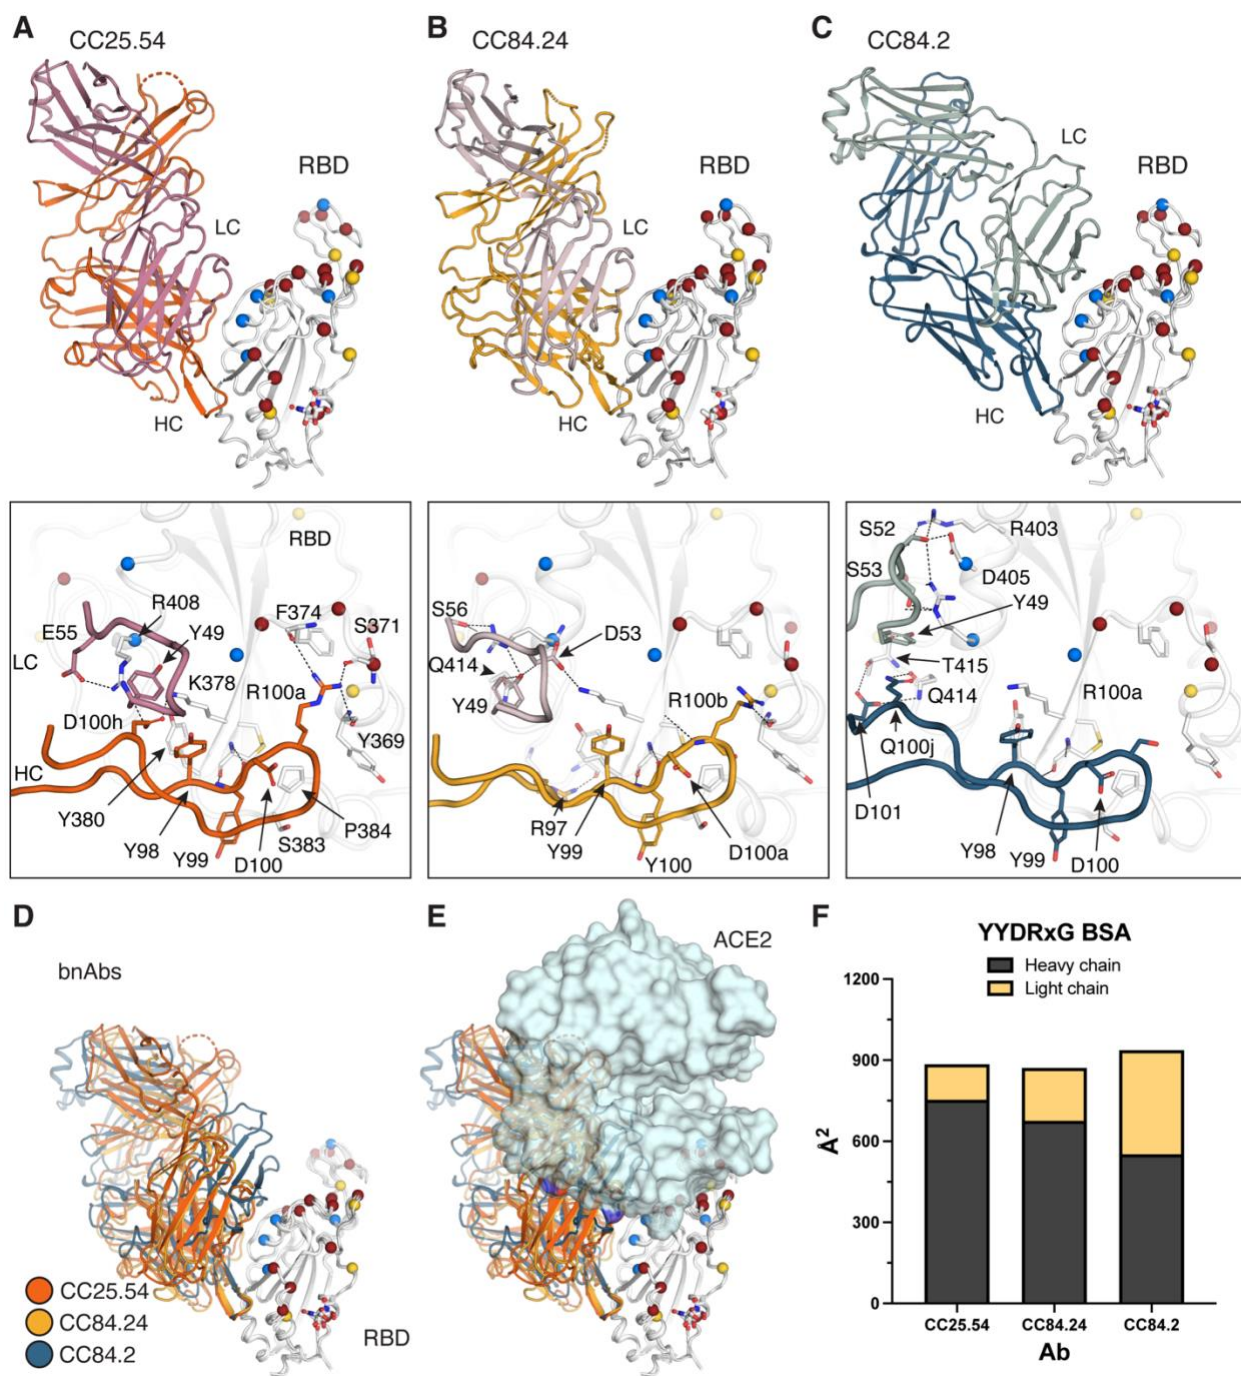

858

859

860 **Figure 3. Crystal structures of representative YYDRxG antibodies from group 1 bnAbs.**

861 X-ray structures of two YYDRxG antibodies, CC25.54 (A) and CC84.24 (B), and a YYDSSG

862 (YYDRxG precursor) antibody CC84.2 (C) are shown in ribbon representation (sticks represents

863 observed N343 glycans in SARS-CoV-2 RBD crystal structure). The same perspective view is

864 used for easy comparison. The CC25.54 heavy chain is colored in orange, light chain in rose pink;

865 CC84.24 heavy chain in yellow, light chain in violet; CC84.2 heavy chain in navy blue, and light

866 chain in teal. Residues from CDRH2 and H3 that interact with the RBD are shown in sticks.

Dashed lines represent polar interactions. RBD residues that are mutated in Omicron are shown

867 as spheres. Red represents residues mutated in BA.1, and additional mutations in blue in BA.4/5  
868 and yellow in XBB.1.5. **(D)** Overlay comparison of YYDRxG antibodies determined in this study.  
869 Crystal structures are superimposed on SARS-CoV-2 RBD to compare the approach angles of  
870 these antibodies. **(E)** YYDRxG antibodies clash with ACE2 binding, although their epitope  
871 footprints do not overlap. Composite structures of YYDRxG antibodies from this study and ACE2  
872 in complex with SARS-CoV-2 RBD (PDB ID: 6M0J) were used for comparison. **(F)** Comparison  
873 of the buried surface area (BSA) on SARS-CoV-2 RBD from the heavy and light chains of  
874 YYDRxG antibodies.  
875

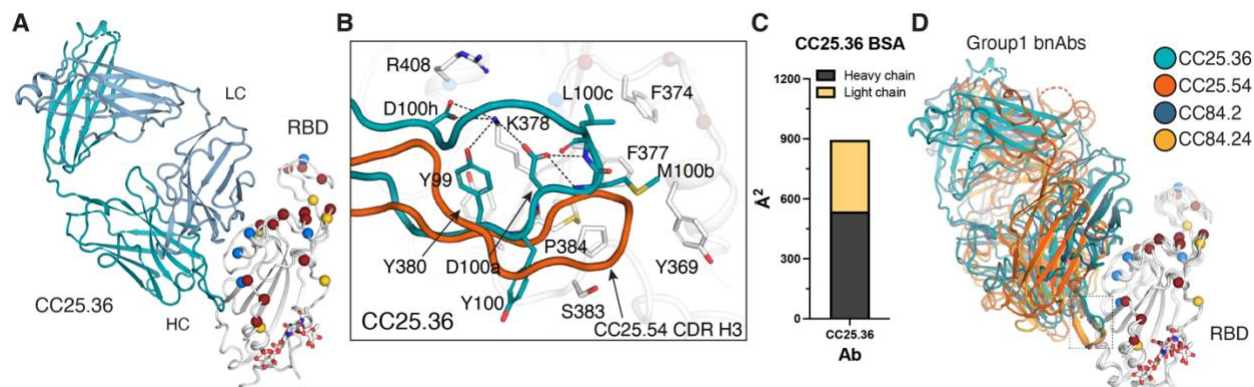

876  
877 **Figure 4. Crystal structure of group 1 antibody CC25.36 in complex with SARS-CoV-2**  
878 **RBD.** Heavy chain is colored in turquoise blue, and light chain in baby blue. RBD residues that  
879 are mutated in Omicron are shown as spheres. Red represents those mutated in BA.1; blue,  
880 additional mutations in BA.4/5; yellow, additional mutations in XBB.1.5.  
881 **A.** Overall structure of CC25.36 is shown in ribbon representation. Sticks represent glycans at  
882 N343 in SARS-CoV-2 RBD.  
883 **B.** Interactions between CDRH3 and RBD. Residues involved in the antibody-antigen interface  
884 are shown in sticks. The same perspective view as Figure 3A was used. CC25.54 CDR H3 was  
885 superimposed for easy comparison with Fig. 3 in orange.  
886 **C.** BSA on SARS-CoV-2 RBD from the CC25.36 heavy and light chains.  
887 **D.** CC25.36 CDRH3 uses a distinct binding mode. Structures of CC25.36 and YYDRxG antibodies  
888 determined in this study are superimposed on the RBD. CC25.36 CDR H3 (boxed) binds the  
889 same site as YYDRxG antibodies but with a different binding mode, although they use similar  
890 approach angles that can compete with ACE2.  
891

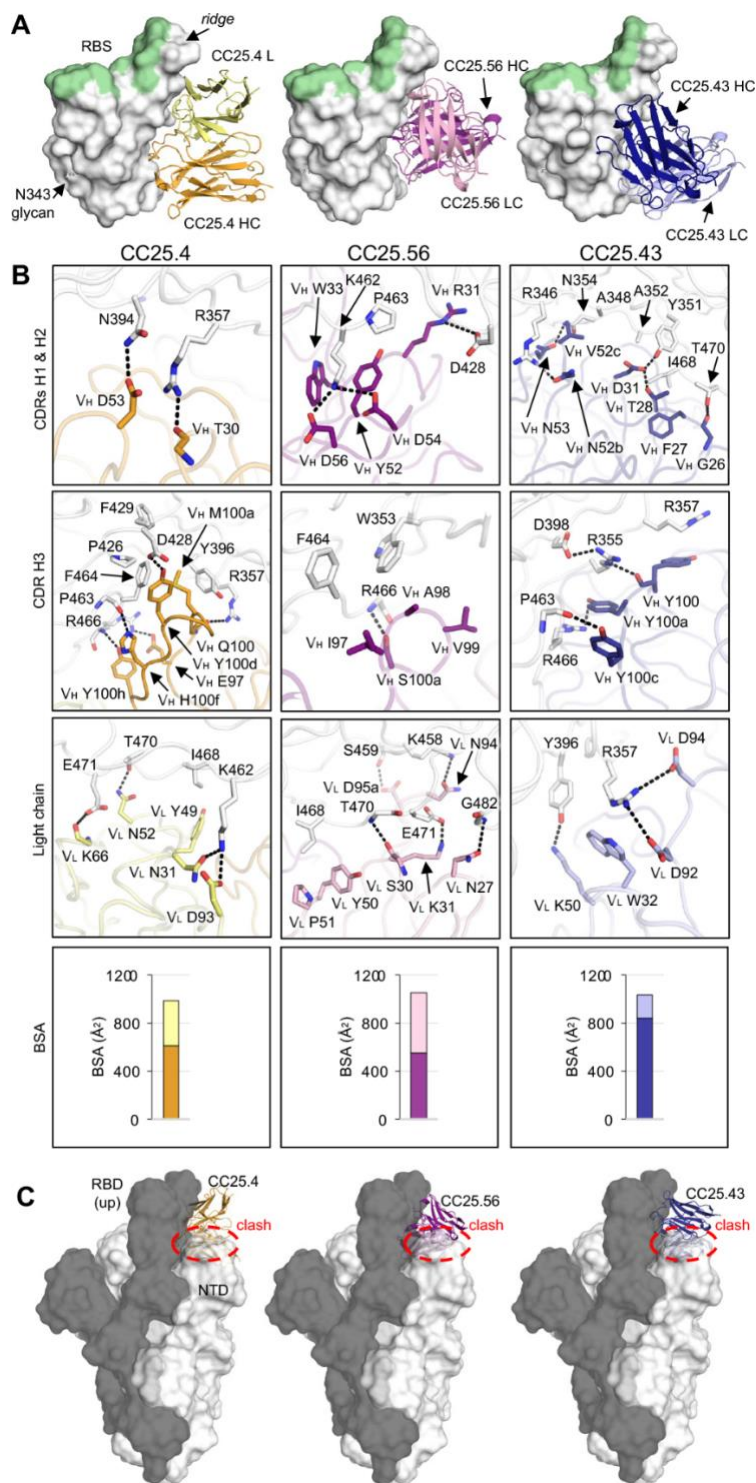

892  
893 **Figure 5. Crystal structures of SARS-CoV-2 RBD in complex with site V antibodies.**  
894 The SARS-CoV-2 RBD is shown in white, while the receptor binding site (RBS) is  
895 highlighted in pale green throughout all the figures. For clarity, only the variable domains  
896 of the antibodies are shown in all figures.  
897 **A.** Crystal structures of SARS-CoV-2 RBD in complex with site V antibodies. The RBD-  
898 N343 N-glycan is shown as sticks. Heavy and light chains of CC25.4 are in orange and

899 yellow, while those of CC25.56 in dark and light pink, and CC25.43 in dark and light blue,  
900 respectively.

901 **B.** Detailed interactions between SARS-CoV-2 RBD and the antibodies. Hydrogen bonds  
902 and salt bridges are indicated by dashed lines. Surface area of SARS-CoV-2 buried by  
903 heavy and light chains of each antibody are shown in the bottom panels.

904 **C.** Models of antibody/RBD structures superimposed onto SARS-CoV-2 spike structures  
905 with one-up RBD (PDB 7KJ5). The spike protomer with an up-RBD is shown in grey, while  
906 the other two protomers are shown in white. Binding to up-RBDs, site V antibodies would  
907 clash with the NTD of the adjacent protomer (indicated with red circles).  
908



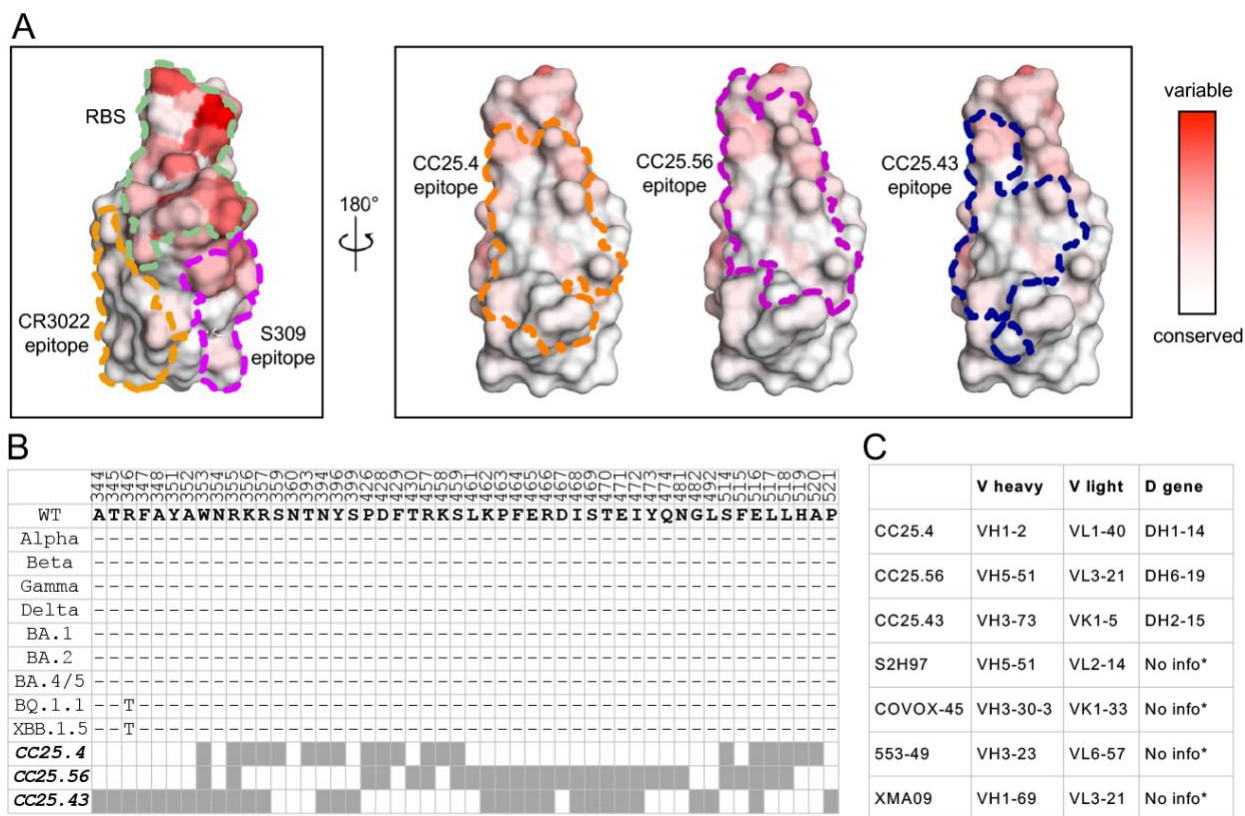

909  
910  
911  
912  
913  
914  
915  
916  
917  
918  
919  
920  
921  
922  
923

**Figure 6. CC25.4, and CC25.56, and CC25.43, target a highly conserved site on the spike RBD.**

**A.** Locations of the receptor binding site (RBS, pale green) and antibody epitopes (orange, magenta, blue) are indicated by dashed lines [defined as RBD residues with BSA > 0 Å<sup>2</sup> as calculated by PISA]. A white-red spectrum is used to represent the conservation of each residue of sarbecoviruses including SARS-CoV-2 VOCs, SARS-CoV-1, etc.<sup>70</sup>

**B.** Sequence alignment of epitope residues of CC25.4, CC25.56, and CC25.43. Identical residues of each variant to the wild-type SARS-CoV-2 are represented by a dash '-'. Epitope residues for each antibody are represented as grey boxes.

**C.** Putative germline genes encoding site V antibodies as predicted by IgBLAST<sup>56</sup>. \* No info: no D gene or nucleotide sequence information was found for the previously published antibodies S2H97, COVOX-45, 553-49, and XMA09.

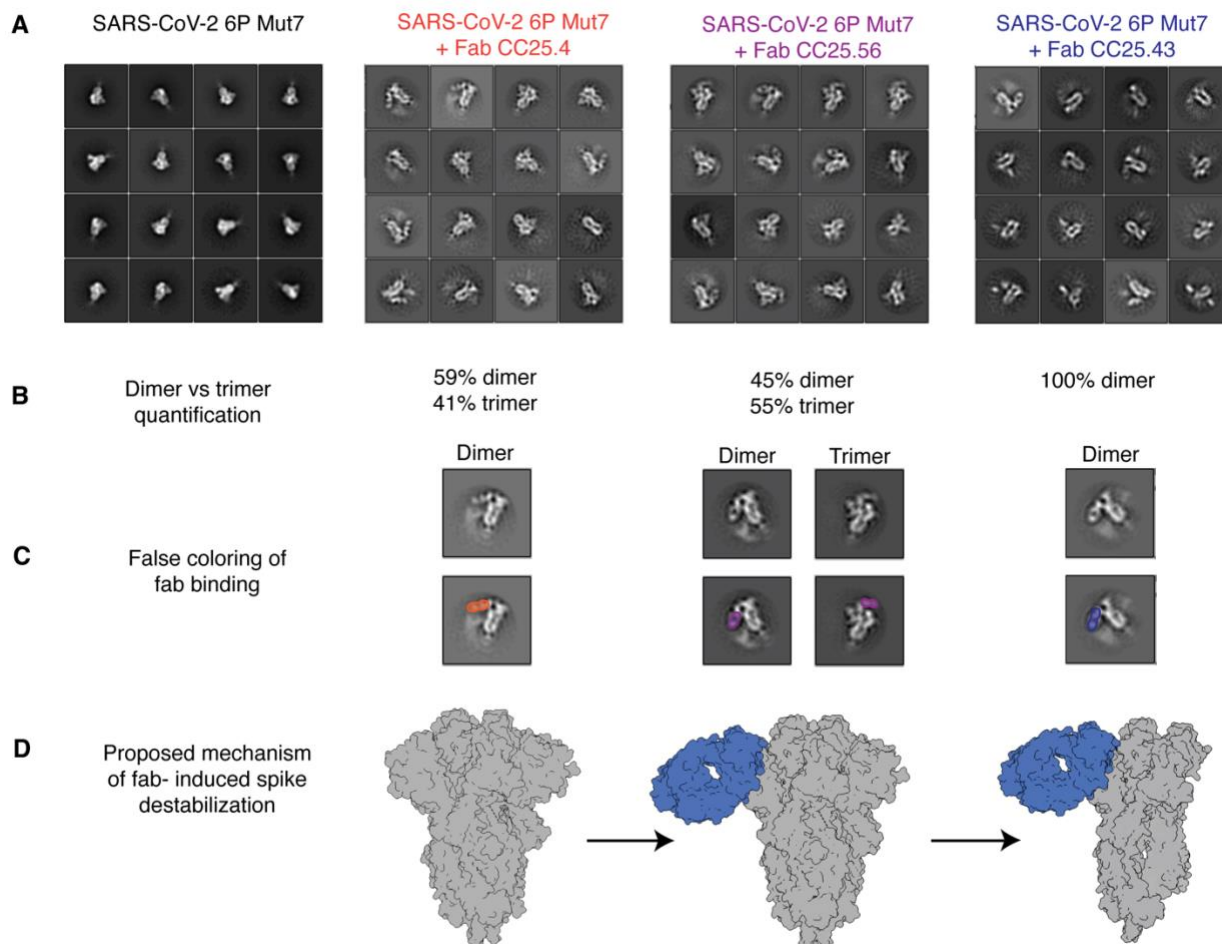

924  
925  
926  
927  
928  
929  
930  
931  
932  
933  
934  
935  
936

**Figure 7. Group 2 RBD bnAbs destabilize the SARS-CoV-2 soluble spike.**

**A.** Representative 2D classifications of SARS-CoV-2 6P Mut7 spike alone and SARS-CoV-2 6P Mut7 spike in complex with group 2 bnAbs, CC25.4, CC25.56, and CC25.43.

**B.** Dimer and trimer proportions were calculated from particle counts within each 2D class.

**C.** bnAb binding to the spike is highlighted using false coloring. BnAb binding to trimer was only observed with CC25.56. CC25.4 is colored orange, CC25.56 is colored purple, and CC25.43 is colored blue.

**D.** Proposed model of spike degradation induced by bnAb binding. Spike model taken from PDB (6VXX)<sup>71</sup>. BnAb positioning is approximated based on 2D classes and is colored blue.

## 937 MATERIAL AND METHODS

938

### 939 Expression and purification of spike and RBD proteins

940 Plasmids coding for the soluble S ectodomain proteins as well as the RBD of human  
941 coronaviruses were transfected into Freestyle293F cells (Thermo Fisher R79007). Per 1  
942 L of Freestyle 293F cells, 350 µg of spike/RBD encoding plasmid was mixed with 40 ml  
943 transfectagro™ (Corning 40-300-CV) and filtered using 0.22 µm Steriflip™ Sterile  
944 Disposable Vacuum Filter Units (MilliporeSigma™ SCGP00525). After filtering, 1.6 mL of  
945 40 K polyethylenimine (Polysciences 24765-1) (1 mg/mL) was added to the plasmid  
946 mixture. The resulting solution was gently mixed and then incubate at room temperature  
947 for 30 minutes before adding into a 1 L FreeStyle293F cell culture at a concentration of 1  
948 x 10<sup>6</sup> cells ml<sup>-1</sup>. Four days after transfection, the cell cultures were centrifuged at 2500 x  
949 g for 15 minutes and the resulting supernatants were filtered through 0.2 µm membrane  
950 filters (Fisher Scientific 564-0020). Cultures were then stored in glass bottles at 4°C  
951 before purification. Filtered supernatants containing His-tagged proteins were passed  
952 slowly through HisPur Ni-NTA Resin (Thermo Fisher 88221) beads in columns, washed  
953 with three bead volumes of wash buffer (25mM Imidazole, pH 7.4) to eliminate non-  
954 specific binding, and then slowly eluted with 25 ml of elution buffer (250mM Imidazole,  
955 pH 7.4). Eluted proteins were buffer exchanged into PBS and then concentrated down  
956 using Amicon® 100 kDa or 10 kDa Ultra-15 Centrifugal Filter Units (Merck Millipore  
957 UFC9100 & UFC9010), respectively, for spike and RBD proteins. The concentrated  
958 proteins were then further purified through size-exclusion chromatography using a  
959 Superdex 200 Increase 10/300 GL column (Sigma-Aldrich GE28-9909-44). Selected  
960 fractions resulting from the size-exclusion run were pooled together and concentrated  
961 again for later use.

962

### 963 Expression and purification of mAbs

964 For the expression of mAbs, HC and LC variable regions were cloned into expression  
965 vectors with corresponding constant regions. 12 µg plasmid of each chain were mixed  
966 into 3 ml Opti-MEM (Gibco 31985070), followed by adding 24 µl FectoPRO transfection  
967 reagent (116-040; Polyplus). After incubating at room temperature for 10 min, the mixture  
968 was gently added into Expi293F cells (Thermo Fisher Scientific A14527) at a  
969 concentration of 2.8 million cells ml<sup>-1</sup> in final expression volumes of 30 ml. 24 h after  
970 transfection, 300 µl sodium valproic acid (300mM) and 275 µl 45% D-(+)-Glucose  
971 Solution, (Sigma G8769-100ML) were added. Five days after transfection, the cell  
972 cultures were centrifuged at 2500 x g for 15 minutes and the resulting supernatants were  
973 filtered using 0.22 µm Steriflip™ Sterile Disposable Vacuum Filter Units  
974 (MilliporeSigma™ SCGP00525). The filtered cell culture supernatants were incubated  
975 overnight at 4 °C with 0.5 ml 1:1 solution of Praesto Protein A Affinity Chromatography  
976 Resin (Purolite PR00300-164) and Protein G Sepharose (Cytiva GE17-0618-01). The  
977 solution was then loaded into an Econo-Pac column (Bio-Rad Laboratories 7321010) and  
978 washed with 1 column volume of PBS. The mAbs were then eluted with 10 ml 0.2M citric  
979 acid (pH 3) and immediately neutralized using 1 ml 2M Tris base (pH 9). The eluted  
980 proteins were buffer exchanged into PBS and then concentrated using Amicon® 30 kDa  
981 Ultra-15 Centrifugal Filter Units (Merck Millipore UFC9030).

982

## 983 **Production of proteins for the BioLayer Interferometry (BLI) competition analysis**

984 Expression and purification of the SARS-CoV-2 spike protein were done as described  
985 previously<sup>28</sup>. Briefly, the ectodomain (residues 14-1213) with R682G / R683G / R685G /  
986 K986P / V987P mutations of the SARS-CoV-2 spike protein (GenBank: QHD43416.1)  
987 was cloned into a customized pFastBac vector<sup>72</sup>. The spike ectodomain constructs were  
988 fused with an N-terminal gp67 signal peptide and a C-terminal BirA biotinylation site,  
989 thrombin cleavage site, trimerization domain, and His6 tag. Recombinant bacmid DNA  
990 was generated using the Bac-to-Bac system (Life Technologies). Baculovirus was  
991 generated by transfecting purified bacmid DNA into Sf9 cells using FuGENE HD  
992 (Promega), and subsequently used to infect suspension cultures of High Five cells (Life  
993 Technologies) at an MOI of 5 to 10. Infected High Five cells were incubated at 28 °C with  
994 shaking at 110 rpm for 72 h for protein expression. The supernatant was then  
995 concentrated using a Centrimate cassette (30 kDa MW cutoff, Pall Corporation). SARS-  
996 CoV-2 Spike were purified by Ni-NTA, followed by size exclusion chromatography, and  
997 then buffer exchanged into PBS. Expression and purification of the N-terminal peptidase  
998 domain of human ACE2 (residues 19 to 615, GenBank: BAB40370.1) was described  
999 previously<sup>73</sup>. ACE2 was cloned into pHCMV3 vector and fused with a C-terminal Fc tag.  
1000 The plasmids were transiently transfected into Expi293F cells using ExpiFectamine™ 293  
1001 Reagent (Thermo Fisher Scientific) according to the manufacturer's instructions. The  
1002 supernatant was collected at 7 days post-transfection. Fc-tagged ACE2 protein was then  
1003 purified with a Protein A column (GE Healthcare) followed by size exclusion  
1004 chromatography.

## 1005 **BioLayer Interferometry binding assay**

1006 Using an Octet RED384 instrument, BLI binding experiments were performed with Anti-  
1007 Human IgG Fc (AHC) biosensors (Sartorius 18-5060). Using Octet buffer (PBS with 0.1%  
1008 Tween20), mAbs were diluted to 10 µg ml<sup>-1</sup>, while spike and RBD proteins were diluted  
1009 to 100 nM and 275 nM, respectively. Samples were transferred to black Polypropylene  
1010 96-well F-Bottom Microplates (Greiner 655209) for BLI experimentation. The hydrated  
1011 biosensors first captured the antibodies for 60 s, and then transferred to Octet buffer for  
1012 60 s to provide the baseline. The biosensors with captured antibodies were then  
1013 introduced to the wells containing the viral proteins for 120 s to measure association  
1014 responses, and into Octet buffer for 240 s to measure disassociation responses. Results  
1015 from the experiment were analyzed with ForteBio Data Analysis software (version 12) for  
1016 curve correction and fitting into a 1:1 binding mode. The binding response and KD values  
1017 were calculated.

1018 For the competition assays of antibodies with ACE2 receptor, Ni-NTA biosensors were  
1019 used. In brief, the assay had five steps: 1) baseline: 60 s with 1x kinetics buffer; 2) loading:  
1020 360 s with 20 µg/mL, His6-tagged SARS-CoV-2 spike protein; 3) baseline: 60 s with 1x  
1021 kinetics buffer; 4) first association: 360 s with Fabs (2 µM, or buffer only as a control); and  
1022 5) second association: 360 s with human ACE2-Fc (200 nM).

## 1023 **Pseudovirus production**

1024 The spike proteins of each tested virus were cloned into a plasmid expression vector with  
1025 each protein's endoplasmic reticulum retrieval signal removed. These plasmids were co-  
1026 transfected with MLV (murine leukemia virus)-CMV (cytomegalovirus) luciferase and MLV  
1027  
1028

1029 Gag/Pol plasmids into HEK-293T cells (ATCC CRL-3216) using Lipofectamine 2000  
1030 (Thermo Fisher 11668019) transfection reagent following the manufacturer's  
1031 recommended protocol. 16 hours after transfection, cell media was replaced with fresh  
1032 warm cell media (DMEM (Corning 10-017-CV) with 10% FBS (Omega Scientific  
1033 NC0471611), 1% L-glutamine (Corning 25-005-CI), and 1% penicillin-streptomycin  
1034 (Corning 30-002-CI)). 48 hours after transfection, supernatant was collected and filtered  
1035 using 0.22  $\mu\text{m}$  Steriflip™ Sterile Disposable Vacuum Filter Units (MilliporeSigma™  
1036 SCGP00525) and the resulting pseudoviruses were stored at  $-80\text{ }^{\circ}\text{C}$  for later use.

1037

### 1038 **Pseudovirus neutralization assay**

1039 We first developed hACE2 expressing cells by transducing hACE2 into HeLa cells (ATCC  
1040 CCL-2) using a lentivirus system. Cells with stable and high hACE2 expression were  
1041 selected to be used for the pseudovirus neutralization assay. For the neutralization assay,  
1042 mAbs were diluted to a starting concentration of  $60\text{ }\mu\text{g ml}^{-1}$  in cell media (DMEM (Corning  
1043 10-017-CV) with 10% FBS (Omega Scientific NC0471611), 1% L-glutamine (Corning 25-  
1044 005-CI), and 1% penicillin-streptomycin (Corning 30-002-CI)) and then three-folds serially  
1045 diluted.  $25\text{ }\mu\text{l}$  of each dilution was added to 96 half-area well plates (Corning 3688) and  
1046 incubated with  $25\text{ }\mu\text{l}$  pseudoviruses per well at  $37\text{ }^{\circ}\text{C}$  for 1 hour. HeLa-hACE2 cells were  
1047 diluted in cell media to  $2 \times 10^5$  cells  $\text{ml}^{-1}$ .  $50\text{ }\mu\text{l}$  of diluted cells containing  $20\text{ }\mu\text{g ml}^{-1}$  DEAE-  
1048 dextran (Sigma-Aldrich 93556-1G) were added to each well. After 48 hours of incubation  
1049 at  $37\text{ }^{\circ}\text{C}$ , supernatant was removed and HeLa-hACE2 cells were lysed with  $60\text{ }\mu\text{l}$  per well  
1050 of a solution containing luciferase lysis buffer (25 mM Gly-Gly, pH 7.8, 15 mM  $\text{MgSO}_4$ , 4  
1051 mM EGTA, 1% Triton X-100) and Bright-Glo (Promega Corporation E2620) at a 1:10 ratio.  
1052 Wells of lysed cells containing Bright Glo were analyzed for luciferase activity using a  
1053 luminometer. Each mAb was tested in duplicate and repeated independently. Percent  
1054 neutralization was determined using the equation below:

1055 Percentage neutralization =  $100 \times (1 - ((\text{RLU of sample}) - (\text{Average RLU of}$   
1056  $\text{CC})) / ((\text{Average RLU of VC}) - (\text{Average RLU of CC})))$

1057 Neutralization percentage was calculated and plotted in Prism 8 (Graph Pad Software)  
1058 and the  $\text{IC}_{50}$  antibody titers were determined by fitting a non-linear regression curve and  
1059 determining the antibody concentration at 50% pseudovirus neutralization.

1060

### 1061 **Production of proteins for structure analysis**

1062 Expression and purification of the SARS-CoV-2 spike receptor-binding domain (RBD) for  
1063 crystallization were as described previously<sup>28</sup>. Briefly, the wild-type RBD (residues 333-  
1064 529) of the spike (S) proteins was cloned into a customized pFastBac vector<sup>74</sup>, and fused  
1065 with an N-terminal gp67 signal peptide and C-terminal His<sub>6</sub> tag<sup>28</sup>. The recombinant  
1066 bacmid DNA was generated using the Bac-to-Bac system (Life Technologies).  
1067 Baculoviruses were generated by transfecting purified bacmid DNAs into Sf9 cells using  
1068 FuGENE HD (Promega), and subsequently used to infect suspension cultures of High  
1069 Five cells (Life Technologies) at an MOI of 5 to 10. Infected High Five cells were incubated  
1070 at  $28\text{ }^{\circ}\text{C}$  with shaking at 110 r.p.m. for 72 h for protein expression. The supernatants were  
1071 then concentrated using a 10 kDa MW cutoff Centrimate cassette (Pall Corporation). The  
1072 RBD protein was purified by Ni-NTA, followed by size exclusion chromatography, and  
1073 buffer exchanged into 20 mM Tris-HCl pH 7.4 and 150 mM NaCl.

1074 Fabs used for crystallization were expressed and purified as follows: the plasmids of  
1075 heavy and light chains were transiently co-transfected into Expi293F cells using  
1076 FectoPRO transfection reagent (116-040; Polyplus) according to the manufacturer's  
1077 instructions. The supernatant was collected at 5 days post-transfection. The Fab was  
1078 purified with a CaptureSelect CH1-XL Pre-packed Column (Thermo Fisher Scientific)  
1079 followed by size exclusion chromatography. VSRRLP and VFNQIKP variants of the elbow  
1080 region was used to reduce the conformational flexibility between the heavy chain constant  
1081 and variable domains of Fabs CC25.4 and CC25.56, respectively, for crystallization <sup>75</sup>.  
1082 For CC25.43, both the heavy and light chains were mutated to facilitate crystal packing.  
1083 A VFNQIKG mutation was applied to the elbow region of the heavy chain <sup>75</sup>, and the FG  
1084 loop of the kappa chain (HQGLSSP) was shortened to QGTTS to facilitate edge-to-edge  
1085 beta-sheet packing <sup>76</sup>. Other structures in this paper were obtained from crystallization  
1086 with unmutated Fabs and RBD.

1087 Fabs used for ns-EM were purified as follows: expressed IgGs were concentrated and  
1088 digested using the Pierce™ Fab Preparation Kit (Thermo Fisher 44985) following  
1089 manufacturer instructions. The resulting Fabs were buffer exchanged into PBS and then  
1090 concentrated down using Amicon® 10 kDa Ultra-15 Centrifugal Filter Units (Merck  
1091 Millipore UFC9010). Selected fractions resulting from the size-exclusion chromatography  
1092 were pooled together and concentrated again for later use.

1093

#### 1094 **Crystallization and structural determination**

1095 CC25.4/RBD, CC25.36/RBD/CV38-142, CC25.54/RBD, CC25.43/RBD, CC25.56/RBD,  
1096 CC84.2/RBD, CC84.24/RBD complexes were formed by mixing each of the protein  
1097 components in an equimolar ratio and incubating overnight at 4°C. The protein complexes  
1098 were adjusted to 8.6–12 mg/ml and screened for crystallization using the 384 conditions  
1099 of the JCSG Core Suite (Qiagen) on our robotic CrystalMation system (Rigaku) at Scripps  
1100 Research. Crystallization trials were set-up by the vapor diffusion method in sitting drops  
1101 containing 0.1 µl of protein and 0.1 µl of reservoir solution. For the CC25.4/RBD complex,  
1102 optimized crystals were grown in drops containing 65% MPD and 0.1 M Bicine pH 9.0 at  
1103 20°C. Crystals appeared on day 28 and were harvested on day 30. Diffraction data were  
1104 collected at cryogenic temperature (100 K) at beamline 23-ID-B of the Advanced Photon  
1105 Source (APS) at Argonne National Labs. For the CC25.36/RBD/CV38-142 complex,  
1106 optimized crystals were grown in drops containing 20% (w/v) PEG-3350 and 0.2 M di-  
1107 ammonium citrate at 20°C. Crystals appeared on day 7 and were harvested on day 15.  
1108 Diffraction data were collected at cryogenic temperature (100 K) at beamline 12-1 of the  
1109 Stanford Synchrotron Radiation Lightsource (SSRL). For the CC25.54/RBD complex,  
1110 optimized crystals were grown in drops containing 20% (w/v) PEG-3350 and 0.2 M  
1111 potassium sodium tartrate pH 7.2 at 20°C. Crystals appeared on day 28 and were  
1112 harvested on day 45. Diffraction data were collected at cryogenic temperature (100 K) at  
1113 beamline 23-ID-B of the Advanced Photon Source (APS) at Argonne National Labs. For  
1114 the CC25.43/RBD complex, optimized crystals were grown in drops containing 1.0 M Li-  
1115 chloride, 10% PEG-6000, and 0.1 M citric acid pH 4.0 at 20°C. Crystals appeared on day  
1116 7 and were harvested on day 15 by soaking in reservoir solution supplemented with 20%  
1117 (v/v) ethylene glycol. Diffraction data were collected at cryogenic temperature (100 K) at  
1118 beamline 23-ID-B of the APS. The B-values of the RBD molecules in the CC25.43/RBD  
1119 complex structure are higher than the overall average B-values because a large region

1120 of the RBDs is exposed in the crystal with lack of stabilization from crystal packing. For  
1121 the CC25.56/RBD complex, optimized crystals were grown in drops containing 10%  
1122 ethylene glycol (v/v), 0.11 M MgCl<sub>2</sub>, and 16% polyethylene glycol 3350 (w/v) at 20°C.  
1123 Crystals appeared on day 7 and were harvested on day 15 with no additional  
1124 cryoprotectant. Diffraction data were collected at cryogenic temperature (100 K) at  
1125 beamline 23-ID-D of the APS. For the CC84.2/RBD complex, optimized crystals were  
1126 grown in drops containing 20% (w/v) PEG-3000 and 0.1 M sodium citrate pH 5.5 at 20°C.  
1127 Crystals appeared on day 21 and were harvested on day 45. Diffraction data were  
1128 collected at cryogenic temperature (100 K) at beamline 23-ID-B of the APS. For the  
1129 CC84.24/RBD complex, optimized crystals were grown in drops containing 20% (w/v)  
1130 PEG-3000 and 0.1 M Sodium citrate pH 5.5 at 20°C. Crystals appeared on day 21 and  
1131 were harvested on day 45. Diffraction data were collected at cryogenic temperature (100  
1132 K) at beamline 23-ID-B of the APS. Diffraction data were processed with either HKL2000  
1133 (PubMed: 27754618) or AutoPROC<sup>77</sup>. Structures were solved by molecular replacement  
1134 using PHASER<sup>78</sup>. Iterative model building and refinement were carried out in COOT<sup>79</sup>  
1135 and PHENIX<sup>80</sup>, respectively. Epitope and paratope residues, as well as their interactions,  
1136 were identified by accessing PISA at the European Bioinformatics Institute  
1137 ([http://www.ebi.ac.uk/pdbe/prot\\_int/pistart.html](http://www.ebi.ac.uk/pdbe/prot_int/pistart.html))<sup>81</sup>.

1138

### 1139 **Negative stain electron microscopy**

1140 SARS-CoV-2 6P Mut7 and monoclonal bnAbs were complexed at a 3:1 molar ratio  
1141 (Fab:spike) for one hour at room temperature and SEC purified using a Superose 6  
1142 Increase 10/300 GL column in an AKTA Pure system. nsEM grids were made by  
1143 depositing 3 µl of complex at a dilution of ~0.03 mg/ml and stained with 2% uranyl formate  
1144 for 90 seconds. Grids were imaged using a Thermo Fisher Falcon 4i Direct Electron  
1145 Detector 4K x 4K camera on a Thermo Fisher Glacios (200 kEV, 73kx mag) and  
1146 micrographs were processed in Relion 3.1<sup>82</sup>. Particles from raw micrographs were picked  
1147 using a Laplacian-of-Gaussian spatial filter and classified into 2D classes. Cartoon figures  
1148 were made in ChimeraX<sup>83</sup>.

1149

### 1150 **Statistical analysis**

1151 Statistical analysis was performed using Graph Pad Prism 8, Graph Pad Software, San  
1152 Diego, California, USA. IC<sub>50</sub> neutralization titers or BLI binding responses were compared  
1153 using the non-parametric unpaired Mann-Whitney-U test. Data were considered  
1154 statistically significant when  $p < 0.05$ .

1155

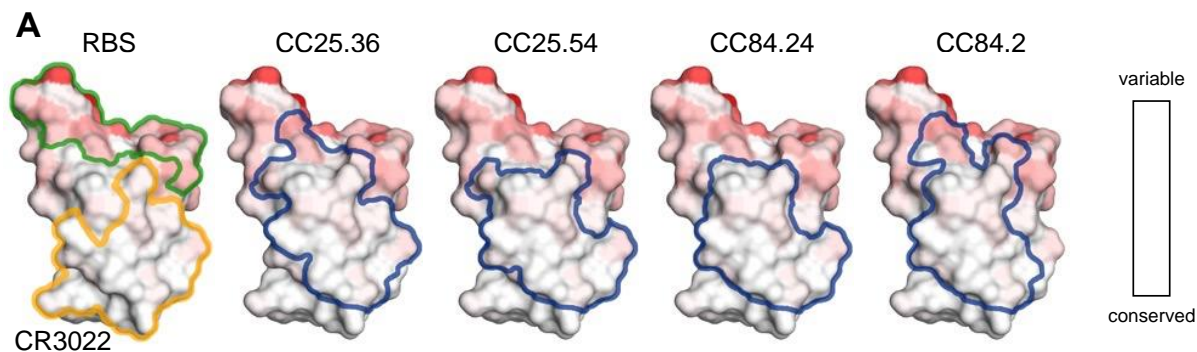

**B**

|         | 368 | 369 | 370 | 371 | 372 | 373 | 374 | 375 | 376 | 377 | 378 | 379 | 380 | 381 | 382 | 383 | 384 | 385 | 386 | 403 | 404 | 405 | 406 | 407 | 408 | 409 | 410 | 411 | 412 | 413 | 414 | 415 | 416 | 417 | 420 | 421 | 424 | 427 | 428 | 429 | 430 | 455 | 456 | 460 | 504 | 505 |   |  |  |
|---------|-----|-----|-----|-----|-----|-----|-----|-----|-----|-----|-----|-----|-----|-----|-----|-----|-----|-----|-----|-----|-----|-----|-----|-----|-----|-----|-----|-----|-----|-----|-----|-----|-----|-----|-----|-----|-----|-----|-----|-----|-----|-----|-----|-----|-----|-----|---|--|--|
| WT      | L   | Y   | N   | S   | A   | F   | S   | T   | F   | K   | C   | Y   | G   | V   | S   | P   | T   | R   | G   | D   | E   | V   | R   | Q   | A   | P   | G   | Q   | T   | G   | K   | D   | D   | K   | D   | D   | D   | F   | T   | L   | F   | N   | G   | Y   |     |     |   |  |  |
| Alpha   | -   | -   | -   | -   | -   | -   | -   | -   | -   | -   | -   | -   | -   | -   | -   | -   | -   | -   | -   | -   | -   | -   | -   | -   | -   | -   | -   | -   | -   | -   | -   | -   | -   | -   | -   | -   | -   | -   | -   | -   | -   | -   | -   | -   | -   |     |   |  |  |
| Beta    | -   | -   | -   | -   | -   | -   | -   | -   | -   | -   | -   | -   | -   | -   | -   | -   | -   | -   | -   | -   | -   | -   | -   | -   | -   | -   | -   | -   | -   | -   | -   | -   | -   | -   | -   | -   | -   | -   | -   | -   | -   | -   | -   | -   | -   | -   |   |  |  |
| Gamma   | -   | -   | -   | -   | -   | -   | -   | -   | -   | -   | -   | -   | -   | -   | -   | -   | -   | -   | -   | -   | -   | -   | -   | -   | -   | -   | -   | -   | -   | -   | -   | -   | -   | -   | -   | -   | -   | -   | -   | -   | -   | -   | -   | -   | -   | -   |   |  |  |
| Delta   | -   | -   | -   | -   | -   | -   | -   | -   | -   | -   | -   | -   | -   | -   | -   | -   | -   | -   | -   | -   | -   | -   | -   | -   | -   | -   | -   | -   | -   | -   | -   | -   | -   | -   | -   | -   | -   | -   | -   | -   | -   | -   | -   | -   | -   | -   |   |  |  |
| BA.1    | -   | -   | -   | L   | -   | -   | F   | -   | -   | -   | -   | -   | -   | -   | -   | -   | -   | -   | -   | -   | -   | -   | -   | -   | -   | -   | -   | -   | -   | -   | -   | -   | -   | -   | -   | -   | -   | -   | -   | -   | -   | -   | -   | -   | -   | -   | H |  |  |
| BA.2    | -   | -   | -   | F   | -   | -   | F   | A   | -   | -   | -   | -   | -   | -   | -   | -   | -   | -   | -   | -   | -   | N   | -   | S   | -   | -   | -   | -   | -   | -   | -   | -   | -   | -   | -   | -   | -   | -   | -   | -   | -   | -   | -   | -   | -   | H   |   |  |  |
| BA.4/5  | -   | -   | -   | F   | -   | -   | F   | A   | -   | -   | -   | -   | -   | -   | -   | -   | -   | -   | -   | -   | -   | N   | -   | S   | -   | -   | -   | -   | -   | -   | -   | -   | -   | -   | -   | -   | -   | -   | -   | -   | -   | -   | -   | -   | -   | H   |   |  |  |
| BQ.1.1  | -   | -   | -   | F   | -   | -   | F   | A   | -   | -   | -   | -   | -   | -   | -   | -   | -   | -   | -   | -   | -   | N   | -   | S   | -   | -   | -   | -   | -   | -   | -   | -   | -   | -   | -   | -   | -   | -   | -   | -   | -   | -   | -   | -   | -   | H   |   |  |  |
| XBB.1.5 | I   | -   | -   | F   | -   | -   | F   | A   | -   | -   | -   | -   | -   | -   | -   | -   | -   | -   | -   | -   | -   | N   | -   | S   | -   | -   | -   | -   | -   | -   | -   | -   | -   | -   | -   | -   | -   | -   | -   | -   | -   | -   | -   | -   | -   | H   |   |  |  |
| CC25.36 |     |     |     |     |     |     |     |     |     |     |     |     |     |     |     |     |     |     |     |     |     |     |     |     |     |     |     |     |     |     |     |     |     |     |     |     |     |     |     |     |     |     |     |     |     |     |   |  |  |
| CC25.54 |     |     |     |     |     |     |     |     |     |     |     |     |     |     |     |     |     |     |     |     |     |     |     |     |     |     |     |     |     |     |     |     |     |     |     |     |     |     |     |     |     |     |     |     |     |     |   |  |  |
| CC84.2  |     |     |     |     |     |     |     |     |     |     |     |     |     |     |     |     |     |     |     |     |     |     |     |     |     |     |     |     |     |     |     |     |     |     |     |     |     |     |     |     |     |     |     |     |     |     |   |  |  |
| CC84.24 |     |     |     |     |     |     |     |     |     |     |     |     |     |     |     |     |     |     |     |     |     |     |     |     |     |     |     |     |     |     |     |     |     |     |     |     |     |     |     |     |     |     |     |     |     |     |   |  |  |

1156  
1157  
1158  
1159  
1160  
1161  
1162  
1163  
1164  
1165  
1166  
1167  
1168

**Figure S1. Group 1 RBD bnAb target a relatively conserved site targeted by class 4 bnAbs.**

**A.** Locations of the receptor binding site (RBS, pale green) and RBD class 4 site CR3022 antibody epitope (orange) are indicated by outlines [defined as RBD residues with buried surface area (BSA) > 0 Å<sup>2</sup> as calculated by PISA]. A white-red spectrum is used to represent the conservation of each residue of sarbecoviruses including SARS-CoV-2 VOCs, SARS-CoV-1, etc. as in the Figure 6A.

**B.** Sequence alignment of epitope residues of group 1 RBD bnAbs, CC25.36, CC25.54, CC84.2 and CC84.24. Identical residues of each variant to the wild-type SARS-CoV-2 are represented by a dash '-'. Epitope residues for each antibody are represented as grey boxes.



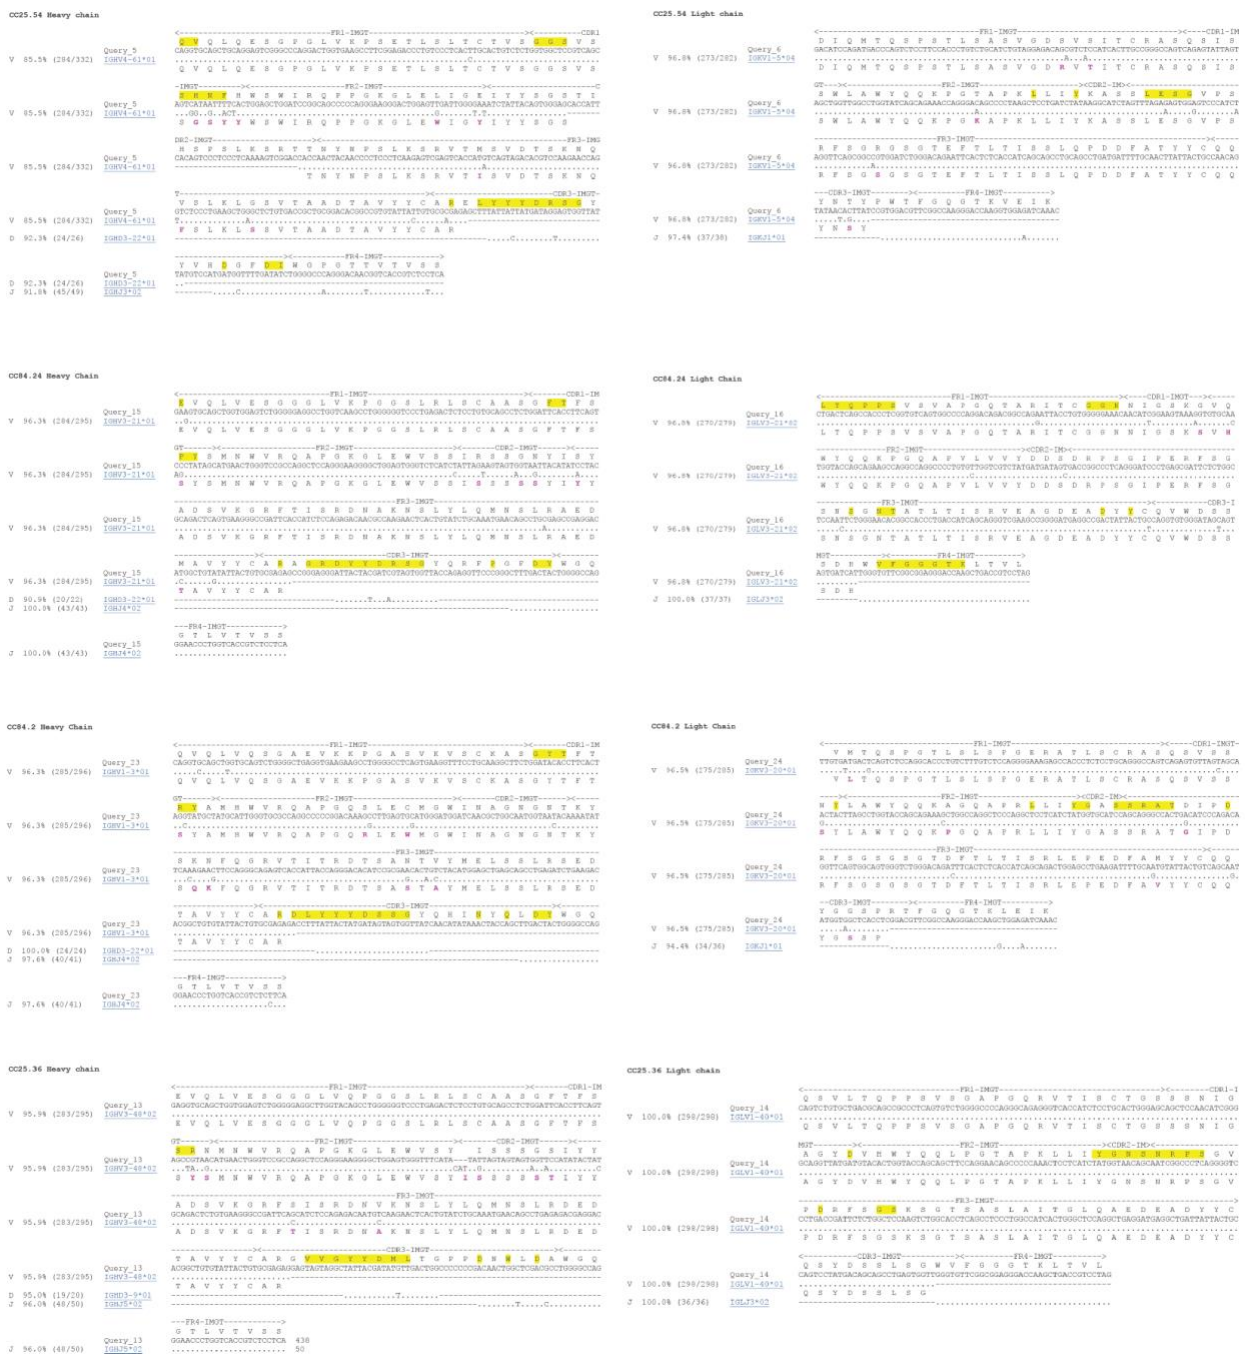

1169  
1170 **Figure S2. Alignment of group 1 RBD broadly neutralizing antibodies and their**  
1171 **putative germline sequences.**

1172 Paratope residues [defined as buried surface area (BSA) > 0 Å<sup>2</sup> as calculated by PISA<sup>81</sup>  
1173 of group 1 RBD bnAbs, CC25.54, CC84.24, CC84.2 and CC25.36 are highlighted with  
1174 yellow boxes. Germline residues that have been somatically mutated as calculated by  
1175 IgBLAST<sup>56</sup> are highlighted in purple.  
1176

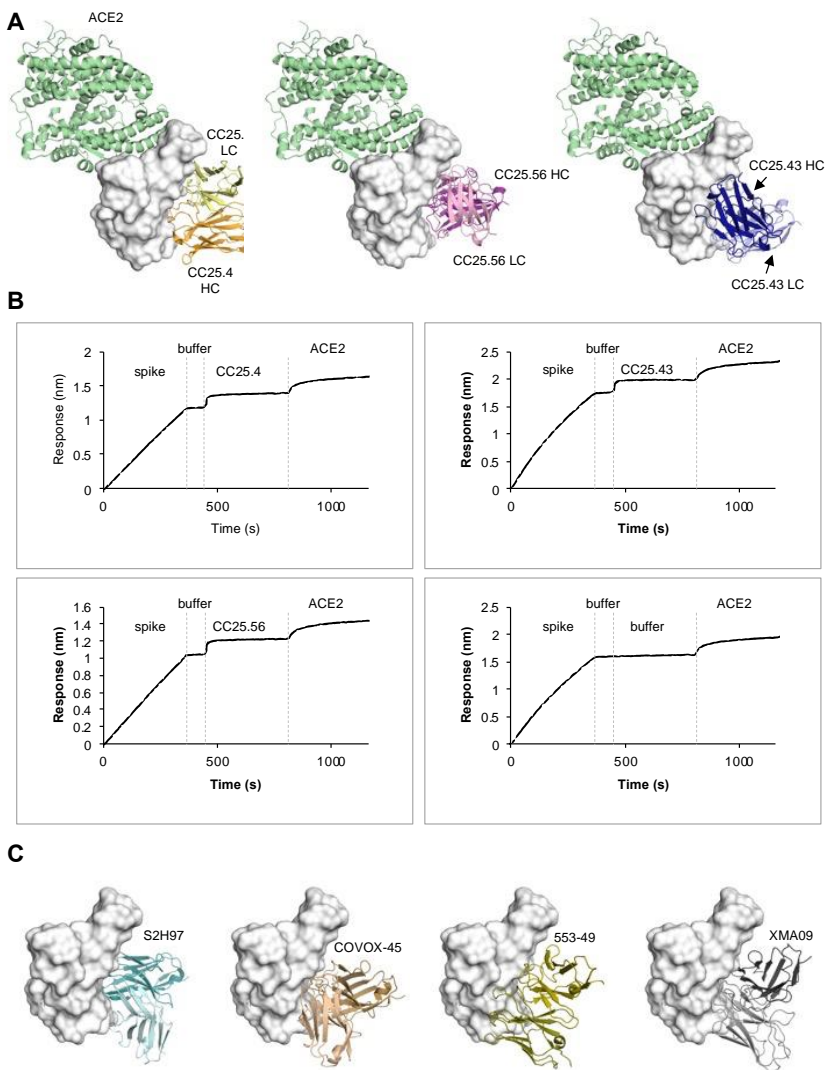

1177  
1178 **Figure S3. Structures of antibodies targeting site V of SARS-CoV-2 RBD.** The SARS-  
1179 CoV-2 RBD is shown in white.  
1180 **A.** The structure of SARS-CoV-2 RBD in complex with human receptor ACE2 (PDB 6M0J)  
1181 was superimposed onto the structures of RBD in complex with site-V antibodies  
1182 determined in this study. ACE2 is in pale green. Heavy and light chains of CC25.4 are in  
1183 orange and yellow, while those of CC25.56 in dark and light pink, and CC25.43 in dark  
1184 and light blue, respectively.  
1185 **B.** Biolayer interferometry assay of ACE2 binding to SARS-CoV-2 S protein in the  
1186 presence of site V targeting Fabs.  
1187 **C.** Comparison with previously reported site-V antibodies. Antibodies S2H97 (PDB  
1188 7M7W), COVOX-45 (PDB 7ORA), 553-49 (PDB 7WOG), and XMA09 (PDB 7WHZ) are  
1189 shown in teal, sand, olive, and grey, respectively (heavy and light chains in dark  
1190 colors).  
1191

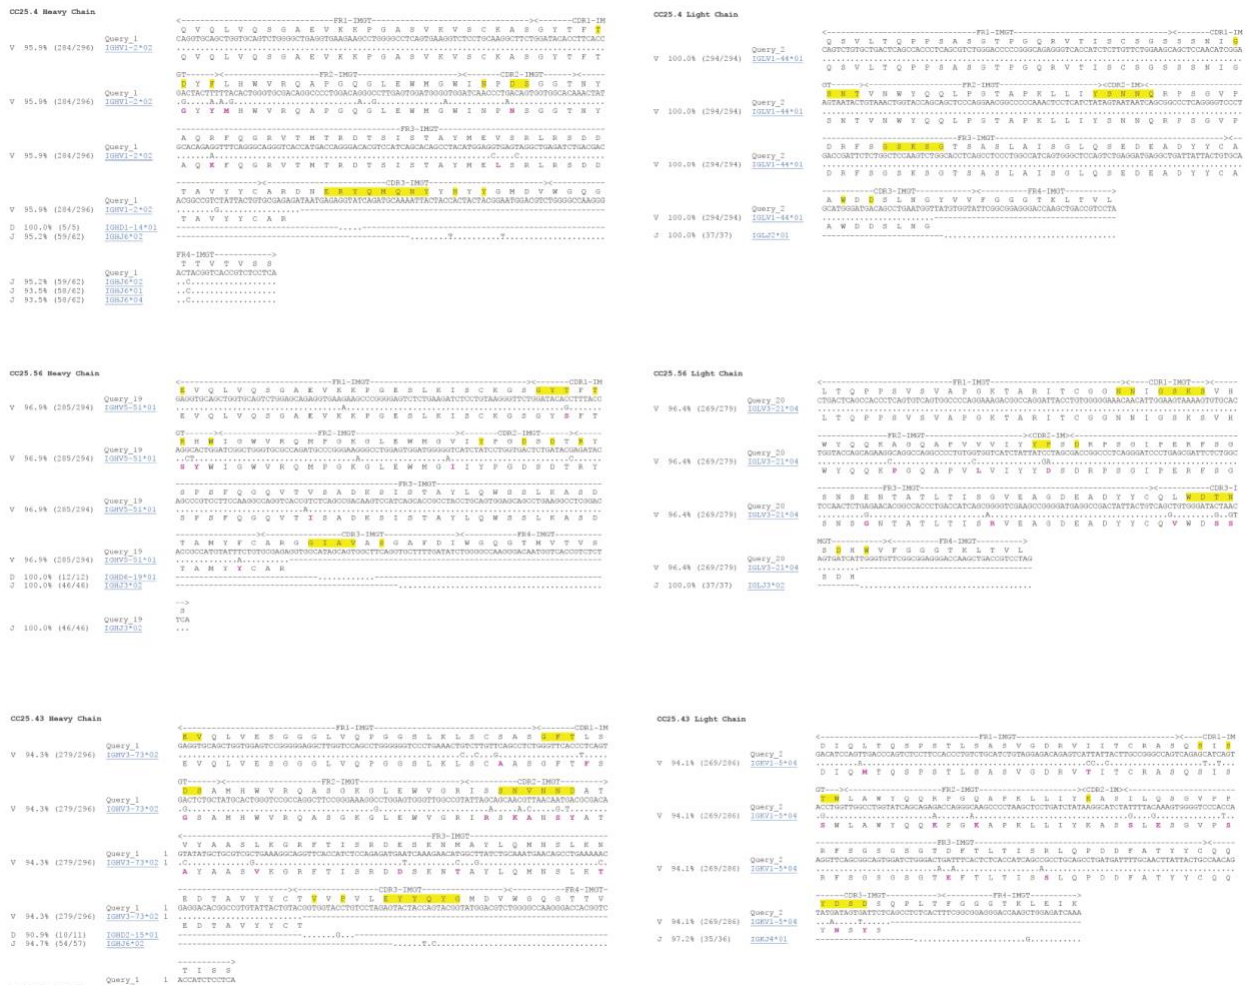

1192  
 1193 **Figure S4. Alignment of group 1 and group 2 RBD broadly neutralizing antibodies**  
 1194 **and their putative germline sequences.**  
 1195 Paratope residues [defined as buried surface area (BSA) > 0 Å<sup>2</sup> as calculated by PISA<sup>81</sup>  
 1196 of group 2 RBD bnAbs, CC25.4, CC25.56 and CC25.43 are highlighted with yellow boxes.  
 1197 Germline residues that have been somatically mutated as calculated by IgBLAST<sup>56</sup> are  
 1198 highlighted in purple.  
 1199



| Group (RBD)  | Clade    | mAb ID | Spike             |        |          |         |         | RBD               |        |          |         |         |
|--------------|----------|--------|-------------------|--------|----------|---------|---------|-------------------|--------|----------|---------|---------|
|              |          |        | SARS-2 (Clade 1b) |        | Clade 1a | Clade 2 | Clade 3 | SARS-2 (Clade 1b) |        | Clade 1a | Clade 2 | Clade 3 |
|              |          |        | WT                | BA.4/5 | SARS-1   | RmYN02  | BM-4831 | WT                | BA.4/5 | SARS-1   | RmYN02  | BM-4831 |
| 1            | CC25.1   | 1.03   | 1.18              | 1.00   | 0.75     | 1.17    | 0.45    | 0.24              | 0.55   | 0.02     | 0.43    |         |
| 1            | CC25.3   | 0.92   | 0.93              | 0.80   | 0.87     | 0.87    | 0.46    | 0.61              | 0.54   | 0.17     | 0.23    |         |
| 1            | CC25.13  | 0.96   | 0.27              | 0.66   | 0.26     | 0.40    | 0.48    | 0.05              | 0.47   | 0.00     | 0.01    |         |
| 1            | CC25.36  | 0.92   | 0.86              | 0.70   | 0.72     | 0.75    | 0.43    | 0.53              | 0.51   | 0.45     | 0.43    |         |
| 1            | CC25.48  | 0.66   | 0.03              | 0.53   | 0.67     | 0.76    | 0.45    | 0.05              | 0.47   | 0.37     | 0.37    |         |
| 1            | CC25.52  | 1.02   | 0.87              | 0.83   | 0.44     | 0.96    | 0.50    | 0.08              | 0.51   | 0.00     | 0.26    |         |
| 1            | CC25.53  | 0.90   | 0.83              | 0.77   | 0.93     | 1.04    | 0.43    | 0.55              | 0.45   | 0.44     | 0.29    |         |
| 1            | CC25.54  | 1.02   | 0.54              | 0.80   | 0.92     | 1.05    | 0.49    | 0.46              | 0.49   | 0.50     | 0.47    |         |
| 1            | CC84.2   | 0.78   | 0.38              | 0.47   | 0.78     | 0.84    | 0.43    | 0.34              | 0.44   | 0.15     | 0.33    |         |
| 1            | CC84.5   | 0.95   | 0.04              | 0.74   | 0.02     | 0.89    | 0.46    | 0.05              | 0.47   | 0.01     | 0.37    |         |
| 1            | CC84.10  | 0.92   | 0.87              | 0.51   | 0.85     | 0.96    | 0.41    | 0.25              | 0.53   | 0.07     | 0.39    |         |
| 1            | CC84.12  | 0.91   | 0.23              | 0.50   | 0.76     | 0.07    | 0.43    | 0.05              | 0.50   | 0.10     | 0.00    |         |
| 1            | CC84.21  | 0.89   | 0.49              | 0.52   | 0.57     | 1.08    | 0.43    | 0.05              | 0.46   | 0.39     | 0.25    |         |
| 1            | CC84.24  | 0.95   | 0.95              | 0.78   | 1.09     | 0.67    | 0.43    | 0.62              | 0.52   | 0.20     | 0.02    |         |
| 2            | CC25.4   | 0.95   | 1.04              | 0.90   | 1.25     | 1.37    | 0.48    | 0.82              | 0.51   | 0.46     | 0.25    |         |
| 2            | CC25.17  | 0.94   | 1.00              | 0.60   | 0.99     | 1.18    | 0.47    | 0.69              | 0.51   | 0.42     | 0.48    |         |
| 2            | CC25.42  | 0.83   | 0.94              | 0.48   | 0.80     | 0.85    | 0.52    | 0.67              | 0.54   | 0.45     | 0.45    |         |
| 2            | CC25.43  | 0.79   | 0.96              | 0.53   | 0.96     | 0.33    | 0.42    | 0.60              | 0.49   | 0.10     | 0.01    |         |
| 2            | CC25.56  | 0.89   | 0.87              | 0.70   | 0.93     | 1.26    | 0.42    | 0.61              | 0.46   | 0.41     | 0.27    |         |
| Control mAbs | S2X259   | 1.00   | 0.71              | 0.76   | 0.40     | 0.88    | 0.47    | 0.27              | 0.49   | 0.10     | 0.41    |         |
|              | C022     | 0.83   | 0.57              | 0.45   | 0.88     | 0.48    | 0.47    | 0.35              | 0.49   | 0.20     | 0.06    |         |
|              | ADI56046 | 1.13   | 0.04              | 0.79   | 0.02     | 0.71    | 0.41    | 0.07              | 0.48   | 0.07     | 0.23    |         |
|              | DH1047   | 0.82   | 0.31              | 0.59   | 0.52     | 0.53    | 0.47    | 0.04              | 0.52   | 0.40     | 0.41    |         |
|              | S309     | 0.75   | 0.57              | 0.66   | 0.01     | 0.33    | 0.29    | 0.34              | 0.52   | 0.00     | 0.06    |         |
|              | CC12.1   | 0.58   | 0.02              | 0.00   | 0.02     | 0.02    | 0.30    | 0.05              | 0.00   | 0.00     | 0.00    |         |
| DEN3         | 0.00     | 0.03   | 0.00              | 0.02   | 0.04     | 0.00    | 0.05    | 0.00              | 0.00   | 0.00     |         |         |

|                   |      |  |
|-------------------|------|--|
| BLI response (nm) | 1    |  |
|                   | 0.5  |  |
|                   | 0.1  |  |
|                   | <0.1 |  |

1212  
1213  
1214  
1215  
1216  
1217  
1218  
1219

**Table S2. BLI binding responses.**

BLI response values (nm) of 14 Group 1 and 5 Group 2 RBD bnAbs binding to the trimeric spike proteins and monomeric RBD proteins of Clade 1b (SARS-CoV-2 and BA.4/5), Clade 1a (SARS-CoV-1), Clade 2 (RmYN02), and Clade 3 (BM-4831) betacoronaviruses. Control antibodies used were SARS-CoV-2 Abs S2X259, C022, ADI56046, DH1047, S309, and CC12.1, and the Dengue antibody DEN3.

1220 **Table S3. X-ray data collection and refinement statistics**

| <b>Data collection</b>                                                             | CC25.36 Fab + SARS-CoV-2 RBD + CV38-142 Fab           | CC25.54 Fab + SARS-CoV-2 RBD           | CC84.2 Fab + SARS-CoV-2 RBD | CC84.24 Fab + SARS-CoV-2 RBD                          |
|------------------------------------------------------------------------------------|-------------------------------------------------------|----------------------------------------|-----------------------------|-------------------------------------------------------|
| Beamline                                                                           | SSRL 12-1                                             | APS 23-IDB                             | APS 23-IDB                  | APS 23-IDB                                            |
| Wavelength (Å)                                                                     | 0.97946                                               | 0.97930                                | 1.03317                     | 1.03317                                               |
| Space group                                                                        | <i>P</i> 2 <sub>1</sub> 2 <sub>1</sub> 2 <sub>1</sub> | <i>P</i> 3 <sub>2</sub> 2 <sub>1</sub> | <i>P</i> 1 2 <sub>1</sub> 1 | <i>P</i> 2 <sub>1</sub> 2 <sub>1</sub> 2 <sub>1</sub> |
| Unit cell parameters                                                               |                                                       |                                        |                             |                                                       |
| a, b, c (Å)                                                                        | 60.4, 77.0, 266.4                                     | 135.9, 135.9, 87.1                     | 68.7, 80.2, 73.5            | 101.4, 106.0, 247.0                                   |
| α, β, γ (°)                                                                        | 90, 90, 90                                            | 90, 90, 90                             | 90, 94.9, 90                | 90, 90, 90                                            |
| Resolution (Å) <sup>a</sup>                                                        | 50.0–2.50 (2.54–2.50)                                 | 50.0–3.30 (3.36–3.30)                  | 50.0–3.08 (3.15–3.08)       | 50.0–2.91 (2.95–2.91)                                 |
| Unique reflections <sup>a</sup>                                                    | 38,811 (1,970)                                        | 14,256 (705)                           | 14,522 (706)                | 54,891 (2,362)                                        |
| Redundancy <sup>a</sup>                                                            | 3.5 (3.3)                                             | 11.5 (7.1)                             | 4.2 (4.2)                   | 6.2 (3.5)                                             |
| Completeness (%) <sup>a</sup>                                                      | 87.8 (92.0)                                           | 99.8 (98.7)                            | 97.9 (97.0)                 | 92.5 (81.3)                                           |
| <I/σ <sub>I</sub> > <sup>a</sup>                                                   | 7.9 (1.1)                                             | 8.0 (2.0)                              | 6.3 (1.0)                   | 6.9 (1.2)                                             |
| <i>R</i> <sub>sym</sub> <sup>b</sup> (%) <sup>a</sup>                              | 15.7 (>100)                                           | 29.8 (97.8)                            | 20.5 (>100)                 | 21.4 (76.6)                                           |
| <i>R</i> <sub>pim</sub> <sup>b</sup> (%) <sup>a</sup>                              | 8.8 (66.0)                                            | 9.1 (38.1)                             | 11.2 (63.6)                 | 8.9 (43.0)                                            |
| CC <sub>1/2</sub> <sup>c</sup> (%) <sup>a</sup>                                    | 98.0 (51.5)                                           | 98.8 (32.1)                            | 99.2 (71.7)                 | 98.3 (42.1)                                           |
| <b>Refinement statistics</b>                                                       |                                                       |                                        |                             |                                                       |
| Resolution (Å)                                                                     | 38.5–2.50                                             | 48.8–3.30                              | 48.0–3.08                   | 48.7–2.91                                             |
| Reflections (work)                                                                 | 32,649                                                | 10,644                                 | 10,876                      | 44,227                                                |
| Reflections (test)                                                                 | 1,635                                                 | 542                                    | 563                         | 2,275                                                 |
| <i>R</i> <sub>cryst</sub> <sup>d</sup> / <i>R</i> <sub>free</sub> <sup>e</sup> (%) | 24.7/28.7                                             | 20.8/23.6                              | 25.6/30.3                   | 26.1/30.9                                             |
| No. of atoms                                                                       | 7,963                                                 | 4,803                                  | 4,647                       | 18,011                                                |
| Macromolecules                                                                     | 7,914                                                 | 4,789                                  | 4,633                       | 17,983                                                |
| Glycans                                                                            | 49                                                    | 14                                     | 14                          | 28                                                    |
| Average <i>B</i> -value (Å <sup>2</sup> )                                          | 50                                                    | 68                                     | 78                          | 66                                                    |
| Macromolecules                                                                     | 50                                                    | 68                                     | 78                          | 66                                                    |
| Fab                                                                                | 51                                                    | 67                                     | 70                          | 70                                                    |
| RBD                                                                                | 46                                                    | 70                                     | 96                          | 58                                                    |
| Glycans                                                                            | 48                                                    | 87                                     | 127                         | 67                                                    |
| Wilson <i>B</i> -value (Å <sup>2</sup> )                                           | 40                                                    | 53                                     | 71                          | 48                                                    |
| <b>RMSD from ideal geometry</b>                                                    |                                                       |                                        |                             |                                                       |
| Bond length (Å)                                                                    | 0.005                                                 | 0.002                                  | 0.004                       | 0.006                                                 |
| Bond angle (°)                                                                     | 0.76                                                  | 0.57                                   | 0.69                        | 1.04                                                  |
| <b>Ramachandran statistics (%)</b>                                                 |                                                       |                                        |                             |                                                       |
| Favored                                                                            | 98.7                                                  | 94.9                                   | 97.6                        | 97.6                                                  |
| Outliers                                                                           | 0.0                                                   | 0.0                                    | 0.0                         | 0.0                                                   |
| <b>PDB code</b>                                                                    | 8SIQ                                                  | 8SIR                                   | 8SIS                        | 8SIT                                                  |

1221

1222

1223 **Table S3. X-ray data collection and refinement statistics-continued**

| Data collection                                                      | CC25.4 + SARS-CoV-2 RBD | CC25.43 + SARS-CoV-2 RBD | CC25.56 + SARS-CoV-2 RBD |
|----------------------------------------------------------------------|-------------------------|--------------------------|--------------------------|
| Beamline                                                             | APS23ID-B               | APS23ID-B                | APS23ID-D                |
| Wavelength (Å)                                                       | 1.0332                  | 1.0332                   | 1.0332                   |
| Space group                                                          | P 1 2 <sub>1</sub> 1    | C 1 2 1                  | C 1 2 1                  |
| Unit cell parameters                                                 |                         |                          |                          |
| a, b, c (Å)                                                          | 58.2, 143.0, 82.9       | 311.9, 83.8, 74.1        | 171.1, 105.6, 99.0       |
| α, β, γ (°)                                                          | 90, 94.1, 90            | 90, 100.8, 90            | 90, 117.3, 90            |
| Resolution (Å) <sup>a</sup>                                          | 82.7-1.79 (1.82-1.79)   | 153.2-2.71 (2.76-2.71)   | 77.8-2.84 (2.89-2.84)    |
| Unique reflections <sup>a</sup>                                      | 126,496 (6,298)         | 47,774 (2,451)           | 36,671 (1,820)           |
| Redundancy <sup>a</sup>                                              | 7.0 (6.5)               | 5.2 (5.2)                | 4.3 (4.2)                |
| Completeness (%) <sup>a</sup>                                        | 99.2 (98.6)             | 93.4 (96.8)              | 99.1 (98.8)              |
| <I/σ <sub>I</sub> > <sup>a</sup>                                     | 9.8 (0.7)               | 7.8 (1.0)                | 6.2 (1.1)                |
| R <sub>sym</sub> <sup>b</sup> (%) <sup>a</sup>                       | 9.4 (>100)              | 16.5 (>100)              | 24.7 (>100)              |
| R <sub>pim</sub> <sup>b</sup> (%) <sup>a</sup>                       | 3.8 (>100)              | 7.8 (98.4)               | 13.6 (96.7)              |
| CC <sub>1/2</sub> <sup>c</sup> (%) <sup>a</sup>                      | 99.8 (35.6)             | 99.5 (49.5)              | 97.1 (36.4)              |
| <b>Refinement statistics</b>                                         |                         |                          |                          |
| Resolution (Å)                                                       | 54.1-1.79               | 72.8-2.71                | 47.7-2.84                |
| Reflections (work)                                                   | 125,886                 | 47,703                   | 36,574                   |
| Reflections (test)                                                   | 12,469                  | 4,945                    | 36,05                    |
| R <sub>cryst</sub> <sup>d</sup> / R <sub>free</sub> <sup>e</sup> (%) | 18.6/21.8               | 26.0/30.4                | 24.6/28.3                |
| No. Fab/RBD copies in ASU                                            | 2                       | 2                        | 2                        |
| No. of atoms                                                         | 10,521                  | 9,536                    | 9,606                    |
| RBD                                                                  | 3,149                   | 3,006                    | 3,118                    |
| Fab                                                                  | 6,528                   | 6,530                    | 6,447                    |
| Ligands <sup>f</sup>                                                 | 64                      | 0                        | 0                        |
| Solvent                                                              | 780                     | 0                        | 41                       |
| Average B-values (Å <sup>2</sup> )                                   | 43                      | 89                       | 55                       |
| RBD                                                                  | 42                      | 128                      | 71                       |
| Fab                                                                  | 44                      | 71                       | 73                       |
| Ligands <sup>f</sup>                                                 | 60                      | N/A                      | N/A                      |
| Solvent                                                              | 46                      | N/A                      | 51                       |
| Wilson B-value (Å <sup>2</sup> )                                     | 32                      | 61                       | 55                       |
| <b>RMSD from ideal geometry</b>                                      |                         |                          |                          |
| Bond length (Å)                                                      | 0.010                   | 0.004                    | 0.004                    |
| Bond angle (°)                                                       | 1.1                     | 0.77                     | 0.87                     |
| <b>Ramachandran statistics (%)<sup>g</sup></b>                       |                         |                          |                          |
| Favored                                                              | 96.3                    | 96.7                     | 97.3                     |
| Outliers                                                             | 0.32                    | 0.16                     | 0.24                     |
| <b>PDB code</b>                                                      | <b>8SDF</b>             | <b>8SDG</b>              | <b>8SDH</b>              |

1224 <sup>a</sup> Numbers in parentheses refer to the highest resolution shell.

1225 <sup>b</sup>  $R_{sym} = \sum_{hkl} \sum_i |I_{hkl,i} - \langle I_{hkl} \rangle| / \sum_{hkl} \sum_i I_{hkl,i}$  and  $R_{pim} = \sum_{hkl} (1/(n-1))^{1/2} \sum_i |I_{hkl,i} - \langle I_{hkl} \rangle| / \sum_{hkl} \sum_i I_{hkl,i}$ , where  $I_{hkl,i}$  is the  
1226 scaled intensity of the  $i^{th}$  measurement of reflection  $h, k, l$ ,  $\langle I_{hkl} \rangle$  is the average intensity for that reflection, and  $n$   
1227 is the redundancy.

1228 <sup>c</sup> CC<sub>1/2</sub> = Pearson correlation coefficient between two random half datasets.

1229 <sup>d</sup>  $R_{cryst} = \sum_{hkl} |F_o - F_c| / \sum_{hkl} |F_o| \times 100$ , where  $F_o$  and  $F_c$  are the observed and calculated structure factors,  
1230 respectively.

1231 <sup>e</sup>  $R_{free}$  was calculated as for  $R_{cryst}$ , but on a test set comprising 2.5% or 5% of the data excluded from refinement.

1232 <sup>f</sup> Bound ligands are MPD.

1233 <sup>g</sup> From MolProbity<sup>84</sup>.
